# Supplementary material for: Hyperthermophilic methanogenic archaea act as high-pressure CH4 cell factories
Source: PubMed Central journal article supplement (PMC7935968; doi:10.1038/s42003-021-01828-5), 2021-03-05
Supplement: 42003_2021_1828_MOESM2_ESM.pdf [file 42003_2021_1828_MOESM2_ESM.pdf]

## **Supplementary Materials**

### **Hyperthermophilic methanogenic archaea act as high-pressure CH<sub>4</sub> cell factories**

Lisa-Maria Mauerhofer<sup>1</sup>, Sara Zwirtmayr<sup>2</sup>, Patricia Pappenreiter<sup>2</sup>, Sébastien Bernacchi<sup>3</sup>, Arne H. Seifert<sup>3</sup>, Barbara Reischl<sup>1,3</sup>, Tilman Schmider<sup>1</sup>, Ruth-Sophie Taubner<sup>1,2</sup>, Christian Paulik<sup>2</sup>, Simon K.-M. R. Rittmann<sup>1,\*</sup>

<sup>1</sup>Archaea Physiology & Biotechnology Group, Department Functional and Evolutionary Ecology, Universität Wien, Wien, Austria

<sup>2</sup>Institute for Chemical Technology of Organic Materials, Johannes Kepler University Linz, Linz, Austria

<sup>3</sup>Krajete GmbH, Linz, Austria

\*Corresponding author:

Dr. Simon K.-M. R. Rittmann, Privatdoz.

Archaea Physiology & Biotechnology Group

Department of Functional and Evolutionary Ecology

Universität Wien

Althanstraße 14

1090 Wien

Austria

Tel.: +43-4277-76513

eFax.: +43-4277-876513

Email: [simon.rittmann@univie.ac.at](mailto:simon.rittmann@univie.ac.at)

## Media compositions

**141 medium** KCl 0.34 g L<sup>-1</sup>, MgCl<sub>2</sub>·6H<sub>2</sub>O 4 g L<sup>-1</sup>, MgSO<sub>4</sub>·7H<sub>2</sub>O 3.45 g L<sup>-1</sup>, NH<sub>4</sub>Cl 0.25 g L<sup>-1</sup>, CaCl<sub>2</sub>·2H<sub>2</sub>O 0.14 g L<sup>-1</sup>, K<sub>2</sub>HPO<sub>4</sub> 0.14 g L<sup>-1</sup>, NaCl 18 g L<sup>-1</sup>, TE solution (141 medium) 10 mL L<sup>-1</sup>, FeII(NH<sub>4</sub>)<sub>2</sub>(SO<sub>4</sub>)<sub>2</sub>·6H<sub>2</sub>O solution (w:v = 0.1%) 2 mL L<sup>-1</sup>, Na-acetate 1 mL L<sup>-1</sup>, Yeast extract 2 g L<sup>-1</sup>, NaHCO<sub>3</sub> 5 g L<sup>-1</sup>, vitamin solution 10 mL L<sup>-1</sup>, L-Cysteine-HCl·H<sub>2</sub>O 0.5 g L<sup>-1</sup>, Na<sub>2</sub>S·9H<sub>2</sub>O 0.5 g L<sup>-1</sup>. Trace element (TE) solution for 141-medium contained the following (TES1): nitrilotriacetic acid 1.5 g L<sup>-1</sup>, MgSO<sub>4</sub>·7H<sub>2</sub>O 3 g L<sup>-1</sup>, MnCl<sub>2</sub>·4H<sub>2</sub>O 0.585 g L<sup>-1</sup>, NaCl 1 g L<sup>-1</sup>, FeSO<sub>4</sub>·7H<sub>2</sub>O 0.1 g L<sup>-1</sup>, CoSO<sub>4</sub>·7H<sub>2</sub>O 0.18 g L<sup>-1</sup>, CaCl<sub>2</sub>·2H<sub>2</sub>O 0.1 g L<sup>-1</sup>, ZnSO<sub>4</sub>·7H<sub>2</sub>O 0.18 g L<sup>-1</sup>, CuSO<sub>4</sub> 0.006 g L<sup>-1</sup>, KAl(SO<sub>4</sub>)<sub>2</sub>·12H<sub>2</sub>O 0.02 g L<sup>-1</sup>, H<sub>3</sub>BO<sub>3</sub> 0.01 g L<sup>-1</sup>, Na<sub>2</sub>MoO<sub>4</sub>·2H<sub>2</sub>O 0.01 g L<sup>-1</sup>, NiCl<sub>2</sub>·6H<sub>2</sub>O 0.03 g L<sup>-1</sup>, Na<sub>2</sub>SeO<sub>3</sub>·5H<sub>2</sub>O 0.3 mg L<sup>-1</sup>, Na<sub>2</sub>WO<sub>4</sub>·2H<sub>2</sub>O 0.4 mg L<sup>-1</sup>. Wolf's vitamin solution (vitamin solution of 141 medium) contained the following: biotine 20 mg L<sup>-1</sup> (81.9 μM), folic acid 20 mg L<sup>-1</sup> (45.3 μM), pyridoxamine dihydrochloride 100 mg L<sup>-1</sup> (386.0 μM), thiamine hydrochloride 50 mg L<sup>-1</sup> (148.0 μM), riboflavin 50 mg L<sup>-1</sup> (133.0 μM), nicotinic acid 50 mg L<sup>-1</sup> (406.0 μM), DL-calcium pantothenate 50 mg L<sup>-1</sup> (105.0 μM), cyanocobalamin 5 mg L<sup>-1</sup> (3.7 μM), p-aminobenzoic 50 mg L<sup>-1</sup> (365.0 μM). FeII(NH<sub>4</sub>)<sub>2</sub>(SO<sub>4</sub>)<sub>2</sub>·6H<sub>2</sub>O solution (w:v = 0.1%) comprised the following: (NH<sub>4</sub>)<sub>2</sub>SO<sub>4</sub> 0.00337 g L<sup>-1</sup> and FeSO<sub>4</sub>·7H<sub>2</sub>O 0.00709 g L<sup>-1</sup>. The FeII(NH<sub>4</sub>)<sub>2</sub>(SO<sub>4</sub>)<sub>2</sub>·6H<sub>2</sub>O solution has to be prepared in dd.H<sub>2</sub>O. 141b medium contained the same ingredients as 141-medium using NaCl 6 g L<sup>-1</sup>, instead of NaCl 16 g L<sup>-1</sup>. 141c medium contained the same ingredients as 141-medium including methanol 5 mL L<sup>-1</sup>.

**203 medium** Mineral solution 1 (K<sub>2</sub>HPO<sub>4</sub> 6 g L<sup>-1</sup>; ultrapure H<sub>2</sub>O Milli-Q® system) 37.5 mL L<sup>-1</sup>, mineral solution 2 (KH<sub>2</sub>PO<sub>4</sub> 6 g L<sup>-1</sup>, (NH<sub>4</sub>)<sub>2</sub>SO<sub>4</sub> 6 g L<sup>-1</sup>, NaCl 12 g L<sup>-1</sup>, MgSO<sub>4</sub>·7H<sub>2</sub>O 2.4 g L<sup>-1</sup>, CaCl<sub>2</sub>·2H<sub>2</sub>O 1.6 g L<sup>-1</sup>; ultrapure H<sub>2</sub>O Milli-Q® system) 37.5 mL L<sup>-1</sup>, NiCl<sub>2</sub>·6H<sub>2</sub>O solution (0.1% w/v) 1 mL L<sup>-1</sup>, FeSO<sub>4</sub>·7H<sub>2</sub>O solution (0.1% w/v in 0.1 M H<sub>2</sub>SO<sub>4</sub>) 2 mL L<sup>-1</sup>. TE solution (TES1) (see medium 141) 10.0 mL, Na<sub>2</sub>SO<sub>4</sub> 3.4 g, NaHCO<sub>3</sub> 2.0 g, Yeast extract (OXOID) 2 g L<sup>-1</sup>, Trypticase peptone (BD BBL) 2 g L<sup>-1</sup>, vitamin solution (see medium 141) 10 mL L<sup>-1</sup>, Na<sub>2</sub>S·9H<sub>2</sub>O 0.5 g L<sup>-1</sup>, L-Cysteine-HCl·H<sub>2</sub>O 0.5 g L<sup>-1</sup>. In case of *Methanothermobacter sociabilis* yeast extract and trypticase peptone is not needed and was therefore not added to the medium. 203c medium was prepared without the addition of vitamins. 203-c medium was prepared without the vitamins and L-Cysteine-HCl·H<sub>2</sub>O.

**511 medium** NH<sub>4</sub>Cl 0.25 g L<sup>-1</sup>, K<sub>2</sub>HPO<sub>4</sub>·3H<sub>2</sub>O 0.07 g L<sup>-1</sup>, KH<sub>2</sub>PO<sub>4</sub> 0.09 g L<sup>-1</sup>, NaCl 11.8 g L<sup>-1</sup>, MgSO<sub>4</sub>·7H<sub>2</sub>O 1.75 g L<sup>-1</sup>, MgCl<sub>2</sub>·6H<sub>2</sub>O 4.5 g L<sup>-1</sup>, Na<sub>2</sub>SO<sub>4</sub> 0.81 g L<sup>-1</sup>, CaCl<sub>2</sub>·2H<sub>2</sub>O 0.78 g L<sup>-1</sup>, KCl 0.3 g L<sup>-1</sup>. TE solution 511 medium (TES5): 10 mL L<sup>-1</sup> 141-medium-TE, and marine TE (see below) 10 mL L<sup>-1</sup>, (NH<sub>4</sub>)<sub>2</sub>Fe(SO<sub>4</sub>)<sub>2</sub>·6H<sub>2</sub>O solution (0.1% w/v) 2 mL L<sup>-1</sup>, (NH<sub>4</sub>)<sub>2</sub>Ni(SO<sub>4</sub>)<sub>2</sub> solution (0.1% w/v) 2 mL L<sup>-1</sup>, Na<sub>2</sub>WO<sub>4</sub>·2H<sub>2</sub>O solution (0.1% w/v) 2 mL L<sup>-1</sup>, NaHCO<sub>3</sub> 1 g L<sup>-1</sup>, vitamins solution (see medium 141) 10 mL L<sup>-1</sup>, Na<sub>2</sub>S·9H<sub>2</sub>O 0.5 g L<sup>-1</sup>. Marine TE solution: NaBr 4 g L<sup>-1</sup>, SrCl<sub>2</sub>·6H<sub>2</sub>O 1.8 g L<sup>-1</sup>, H<sub>3</sub>BO<sub>3</sub> 1.3 g L<sup>-1</sup>, KI 1.25 mg L<sup>-1</sup>, Na-silicate 100 mg L<sup>-1</sup>, NaF 60 mg L<sup>-1</sup>, KNO<sub>3</sub> 40 mg L<sup>-1</sup>, Na<sub>2</sub>HPO<sub>4</sub>·3H<sub>2</sub>O 0.25 mg L<sup>-1</sup>. 511-v medium was prepared without vitamins.

**SAB medium** (modified): MgSO<sub>4</sub>·7H<sub>2</sub>O 0.8 g L<sup>-1</sup>, KH<sub>2</sub>PO<sub>4</sub> 0.5 g L<sup>-1</sup>, K<sub>2</sub>HPO<sub>4</sub> 0.5 g L<sup>-1</sup>, CaCl<sub>2</sub>·6H<sub>2</sub>O 0.05 g L<sup>-1</sup>, NaCl 1.5 g L<sup>-1</sup>, NH<sub>4</sub>Cl 1 g L<sup>-1</sup>, Na<sub>2</sub>S·9H<sub>2</sub>O 0.3 g L<sup>-1</sup>, sodium acetate 1 g L<sup>-1</sup>, yeast extract 2 g L<sup>-1</sup>, 5mM valeric acid, 5 mM isovaleric acid, 5 mM 2-methylbutyric acid, 6 mM isobutyric acid, 5 mM 2-methyl valeric acid, 1000x TE solution 1 mL L<sup>-1</sup>. The

SAB-TE solution (TES2) contained the following: nitrilotriacetic acid 1.5 g L<sup>-1</sup>, NiCl<sub>2</sub>·6H<sub>2</sub>O 15 g L<sup>-1</sup>, KCl 0.5 g L<sup>-1</sup>, MnSO<sub>4</sub>·7H<sub>2</sub>O 6 g L<sup>-1</sup>, ZnSO<sub>4</sub>·7H<sub>2</sub>O 1 g L<sup>-1</sup>, CuSO<sub>4</sub> 1.278 g L<sup>-1</sup>, KAl(SO<sub>4</sub>)<sub>2</sub>·12H<sub>2</sub>O 2 mg L<sup>-1</sup>, H<sub>3</sub>BO<sub>3</sub> 70 mg L<sup>-1</sup>, CoSO<sub>4</sub>·7H<sub>2</sub>O 40 mg L<sup>-1</sup>, Na<sub>2</sub>MoO<sub>3</sub>·H<sub>2</sub>O 5 g L<sup>-1</sup>, Na<sub>2</sub>SeO<sub>3</sub>·5H<sub>2</sub>O 30 mg L<sup>-1</sup>, Na<sub>2</sub>WO<sub>4</sub>·2H<sub>2</sub>O 40 mg L<sup>-1</sup>, FeSO<sub>4</sub>·7H<sub>2</sub>O 9 g L<sup>-1</sup>. After anaerobization and autoclaving the medium, L-Cysteine-HCl·H<sub>2</sub>O 0.5 g L<sup>-1</sup>, 4 M methanol 20 mL L<sup>-1</sup>, 8 M sodium format 20 mL L<sup>-1</sup>, 10% NaHCO<sub>3</sub> 20 mL L<sup>-1</sup>, 2% Na<sub>2</sub>S·9H<sub>2</sub>O 20 mL L<sup>-1</sup> and vitamin solution 15 mL L<sup>-1</sup> (Wolf's vitamin solution) must be added to the serum bottles. The pH in the serum bottles was adjusted to 7.5 with 10 M KOH.

**Medium 6** NH<sub>4</sub>Cl 1 g L<sup>-1</sup>, MgCl<sub>2</sub>·6H<sub>2</sub>O 1 g L<sup>-1</sup>, CaCl<sub>2</sub>·2H<sub>2</sub>O 0.4 g L<sup>-1</sup>, KH<sub>2</sub>PO<sub>4</sub>·2H<sub>2</sub>O 0.6325 g L<sup>-1</sup>, NaHCO<sub>3</sub> 12 g L<sup>-1</sup>, Na<sub>2</sub>S·9H<sub>2</sub>O 0.9092 g L<sup>-1</sup>. TE solution 10 mL L<sup>-1</sup>, vitamin solution<sup>1</sup> 10 mL L<sup>-1</sup>. TE solution (TES6)<sup>2</sup>: nitrilotriacetic acid 1.5 g L<sup>-1</sup>, dissolve nitrilotriacetic acid with KOH to pH 6.5; then proceed with mineral addition: MgSO<sub>4</sub>·7H<sub>2</sub>O 3 g L<sup>-1</sup>, MnCl<sub>2</sub>·4H<sub>2</sub>O 0.529 g L<sup>-1</sup>, NaCl 1 g L<sup>-1</sup>, FeSO<sub>4</sub>·7H<sub>2</sub>O 0.1 g L<sup>-1</sup>, CoCl<sub>2</sub>·6H<sub>2</sub>O 0.1833 g L<sup>-1</sup>, CaCl<sub>2</sub>·2H<sub>2</sub>O 0.1 g L<sup>-1</sup>, ZnSO<sub>4</sub>·7H<sub>2</sub>O 0.1781 g L<sup>-1</sup>, CuSO<sub>4</sub> 0.0063 g L<sup>-1</sup>, AlK(SO<sub>4</sub>)<sub>2</sub> 0.01 g L<sup>-1</sup>, AlK(SO<sub>4</sub>)<sub>2</sub>·12H<sub>2</sub>O 0.0184 g L<sup>-1</sup>, H<sub>3</sub>BO<sub>3</sub> 0.01 g L<sup>-1</sup>, Na<sub>2</sub>MoO<sub>4</sub>·2H<sub>2</sub>O 0.01 g L<sup>-1</sup> (pH to 7.0 with KOH).

**McN medium** for Methanococci contained: KCl 0.335 g L<sup>-1</sup>, MgCl<sub>2</sub>·6H<sub>2</sub>O 2.75 g L<sup>-1</sup>, MgSO<sub>4</sub>·7H<sub>2</sub>O 3.45 g L<sup>-1</sup>, NH<sub>4</sub>Cl 0.5 g L<sup>-1</sup>, CaCl<sub>2</sub>·2H<sub>2</sub>O 0.14 g L<sup>-1</sup>, K<sub>2</sub>HPO<sub>4</sub> 1.4 g L<sup>-1</sup> and NaCl 21.975 g L<sup>-1</sup>. TE solution (TES3) 10 mL L<sup>-1</sup> (MM medium TE solution), iron stock solution 5 mL L<sup>-1</sup>. After anaerobization and autoclaving the medium, Na<sub>2</sub>S·9H<sub>2</sub>O 0.5 g L<sup>-1</sup> must be added. Fe(NH<sub>4</sub>)<sub>2</sub>(SO<sub>4</sub>)<sub>2</sub> solution for MCN medium: 2 g, Fe(NH<sub>4</sub>)<sub>2</sub>(SO<sub>4</sub>)<sub>2</sub>·6H<sub>2</sub>O and 100 µL conc. HCl must be mixed and filled up to 1 L with ultrapure H<sub>2</sub>O Milli-Q®.

**282c 0, 282c 18, or 282c 30 medium** (282 medium with cysteine and 0 g, 18 g, or 30 g NaCl): K<sub>2</sub>HPO<sub>4</sub> 0.14 g L<sup>-1</sup>, CaCl<sub>2</sub>·2H<sub>2</sub>O 0.14 g L<sup>-1</sup>, NH<sub>4</sub>Cl 0.25 g L<sup>-1</sup>, MgSO<sub>4</sub>·7H<sub>2</sub>O 3.4 g L<sup>-1</sup>, MgCl<sub>2</sub>·6H<sub>2</sub>O 4.1 g L<sup>-1</sup>, KCl 0.33 g L<sup>-1</sup>, NiCl<sub>2</sub>·6H<sub>2</sub>O solution (0.1% w/v) 0.5 mL, NaCl 0 g L<sup>-1</sup> (*M. palustre*), 18 g L<sup>-1</sup> (*M. villosus*) or 30 g L<sup>-1</sup> (*M. vulcanius*, *M. jannaschii*), Fe(NH<sub>4</sub>)<sub>2</sub>(SO<sub>4</sub>)<sub>2</sub>·6H<sub>2</sub>O 0.01 g L<sup>-1</sup>, TE solution (TES1) (DSMZ medium 141) 10 mL L<sup>-1</sup>. After anaerobization and autoclaving the medium, NaHCO<sub>3</sub> 1 g L<sup>-1</sup>, L-Cysteine-HCl·H<sub>2</sub>O 0.5 g L<sup>-1</sup> and Na<sub>2</sub>S·9H<sub>2</sub>O 0.5 g L<sup>-1</sup> have to be added. 282-c 30 was prepared without the addition of L-Cysteine-HCl·H<sub>2</sub>O.

**282c 18\_E medium** K<sub>2</sub>HPO<sub>4</sub> 0.14 g L<sup>-1</sup>, CaCl<sub>2</sub>·2H<sub>2</sub>O 0.14 g L<sup>-1</sup>, NH<sub>4</sub>Cl 0.25 g L<sup>-1</sup>, MgSO<sub>4</sub>·7H<sub>2</sub>O 3.4 g L<sup>-1</sup>, MgCl<sub>2</sub>·6H<sub>2</sub>O 4.1 g L<sup>-1</sup>, KCl 0.33 g L<sup>-1</sup>, NiCl<sub>2</sub>·6H<sub>2</sub>O 0.5 mg L<sup>-1</sup>, Na<sub>2</sub>SeO<sub>3</sub>·5H<sub>2</sub>O 0.5 mg L<sup>-1</sup>, NaCl 18 g L<sup>-1</sup> (*M. villosus*) or 30 g L<sup>-1</sup> (*M. vulcanius*, *M. jannaschii*), FeSO<sub>4</sub>·7H<sub>2</sub>O 7 mg L<sup>-1</sup>, TE solution (TES1) (DSMZ medium 141) 10 mL L<sup>-1</sup>. After anaerobization and autoclaving the medium, NaHCO<sub>3</sub> 1 g L<sup>-1</sup>, L-Cysteine-HCl·H<sub>2</sub>O 0.5 g L<sup>-1</sup>, Na<sub>2</sub>S·9H<sub>2</sub>O 0.5 g L<sup>-1</sup> must be added. TE solution for 282 medium contained the following: nitrilotriacetic acid 1.5 g L<sup>-1</sup>, MgSO<sub>4</sub>·7H<sub>2</sub>O 3 g L<sup>-1</sup>, MnCl<sub>2</sub>·4H<sub>2</sub>O 0.585 g L<sup>-1</sup>, NaCl 1 g L<sup>-1</sup>, FeSO<sub>4</sub>·7H<sub>2</sub>O 0.1 g L<sup>-1</sup>, CoSO<sub>4</sub>·7H<sub>2</sub>O 0.18 g L<sup>-1</sup>, CaCl<sub>2</sub>·2H<sub>2</sub>O 0.1 g L<sup>-1</sup>, ZnSO<sub>4</sub>·7H<sub>2</sub>O 0.18 g L<sup>-1</sup>, CuSO<sub>4</sub> 0.006 g L<sup>-1</sup>, KAl(SO<sub>4</sub>)<sub>2</sub>·12H<sub>2</sub>O 0.02 g L<sup>-1</sup>, H<sub>3</sub>BO<sub>3</sub> 0.01 g L<sup>-1</sup>, Na<sub>2</sub>MoO<sub>4</sub>·2H<sub>2</sub>O 0.01 g L<sup>-1</sup>, NiCl<sub>2</sub>·6H<sub>2</sub>O 0.03 g L<sup>-1</sup>, Na<sub>2</sub>SeO<sub>3</sub>·5H<sub>2</sub>O 0.3 mg L<sup>-1</sup>, Na<sub>2</sub>WO<sub>4</sub>·2H<sub>2</sub>O 0.4 mg L<sup>-1</sup>.

***Methanothermobacter marburgensis* medium (MM)** contained the following compounds:  $\text{NH}_4\text{Cl}$  2.1 g L<sup>-1</sup>,  $\text{KH}_2\text{PO}_4$  6.8 g L<sup>-1</sup>,  $\text{Na}_2\text{CO}_3$  3.6 g L<sup>-1</sup>, 100x TE 10 mL L<sup>-1</sup>. After anaerobization and autoclaving the medium, 0.5 M  $\text{Na}_2\text{S}\cdot 9\text{H}_2\text{O}$  2 mL L<sup>-1</sup> must be added. 100x TE solution (TES3) contained: Titriplex I 9 g L<sup>-1</sup>, add 800 mL ultrapure  $\text{H}_2\text{O}$  Milli-Q® system and adjust the pH to 6.5 with 5M NaOH solution, then add:  $\text{MgCl}_2\cdot 6\text{H}_2\text{O}$  4 g L<sup>-1</sup>,  $\text{FeCl}_2\cdot 4\text{H}_2\text{O}$  1 g L<sup>-1</sup>,  $\text{CoCl}_2\cdot 6\text{H}_2\text{O}$  20 mg L<sup>-1</sup>,  $\text{NiCl}_2\cdot 6\text{H}_2\text{O}$  120 mg L<sup>-1</sup>,  $\text{NaMoO}_4\cdot 2\text{H}_2\text{O}$  20 mg L<sup>-1</sup>, put to pH= 7.0 with 1 M NaOH. MM15 and MM30 contained additionally 15 or 30 g L<sup>-1</sup> NaCl. MM15c and MM30c contained additionally L-Cysteine-HCl·H<sub>2</sub>O 0.5 g L<sup>-1</sup>. MM15v contained additionally 10 mL L<sup>-1</sup> of vitamins (medium 141).

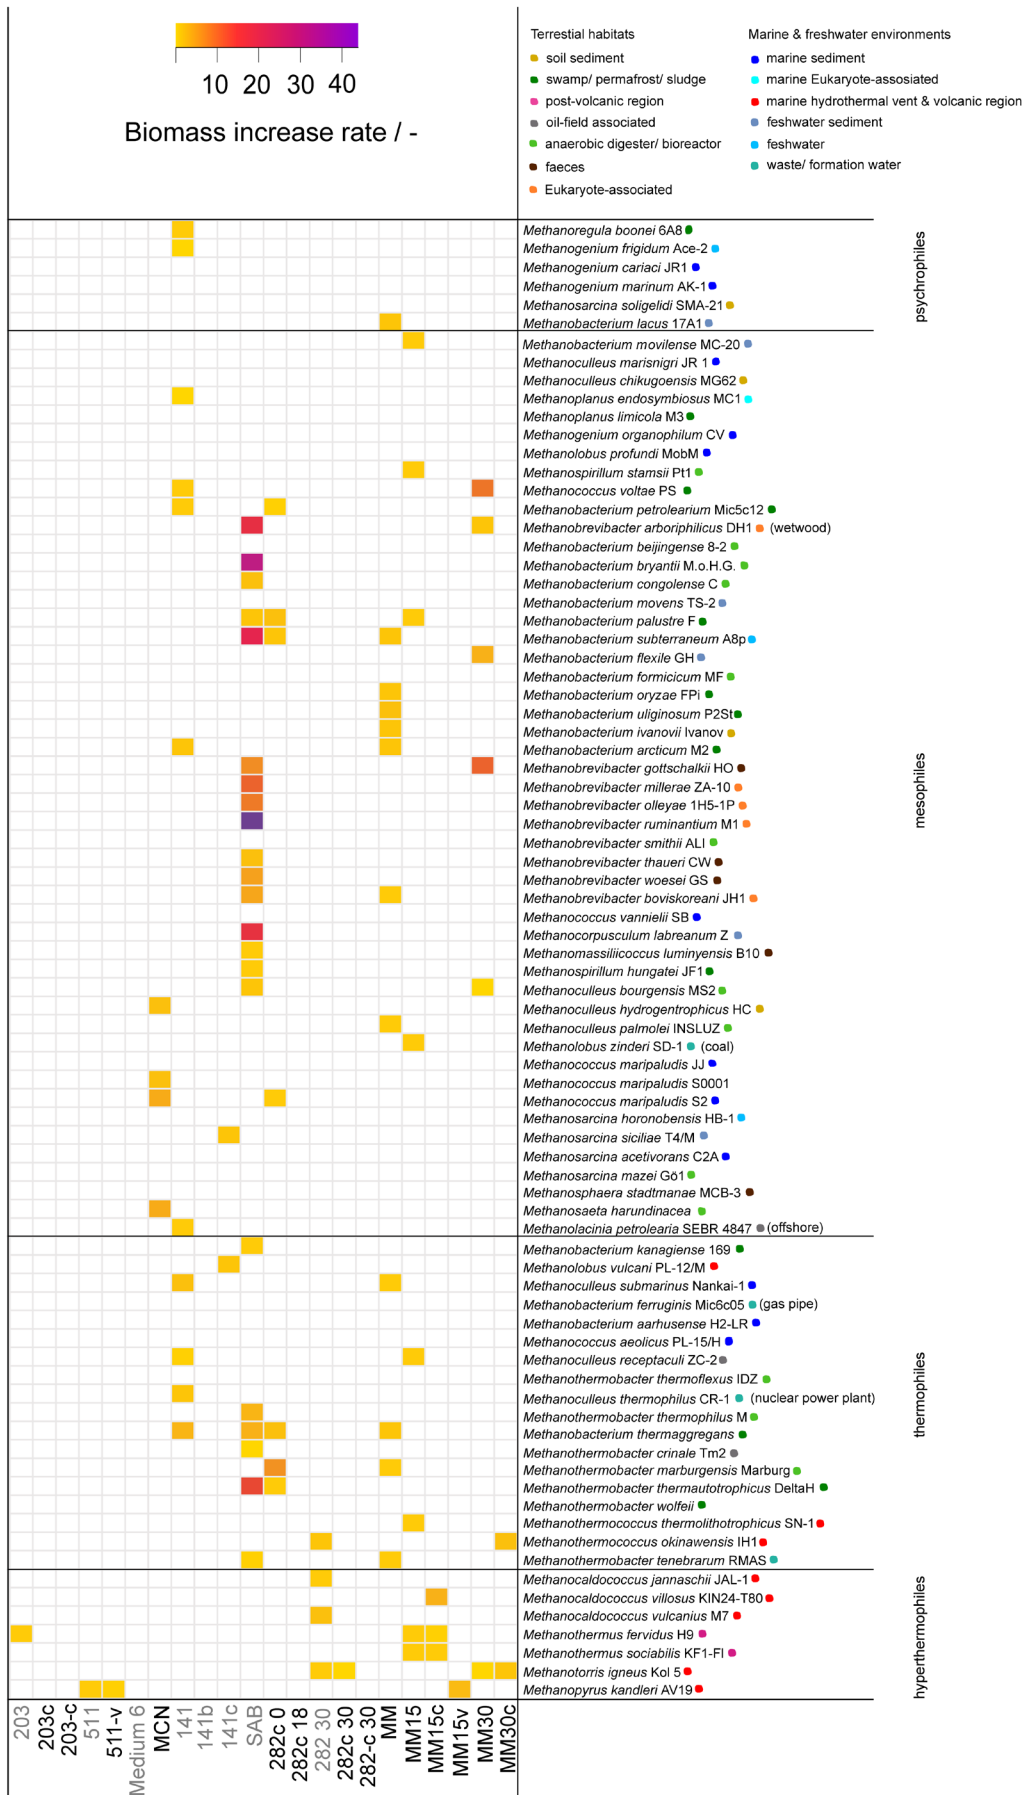

**Fig. S1** Results of the multivariate pre-screen of 80 methanogens in defined and complex media respectively to the biomass increase rate. Experiments were performed in closed batch cultivation systems at 2 bar (120mL flasks, 50 mL medium). On the y-axis, methanogens were arranged as groups according to their temperature optimum in psychrophiles, mesophiles, thermophiles or hyperthermophiles. Methanogens are listed with ascending strain specific temperature optimum from top to bottom. Coloured points next to the strain designation on the y-axis indicate the isolation site of the tested methanogen (terrestrial habitats: golden brown - soil sediment, dark green - swamp/permafrost/sludge, pink - post-volcanic region, grey - oil-field associated, light green - anaerobic digester/bioreactor, brown - faeces, orange - eukaryote-associated; marine and freshwater environments: bright blue - marine sediment, turquoise - marine eukaryote-associated, red - marine hydrothermal vent and volcanic region, grey blue - freshwater sediment, sky blue - freshwater, green blue - waste/formation water). In total, 22 defined and complex media were tested, but not every strain could be or was cultivated on every medium. Defined and complex media are shown on the x-axis in black and grey fonts, respectively. For each closed batch cultivation, three biological replicates (in some cases, two biological replicates) plus one negative control were used.

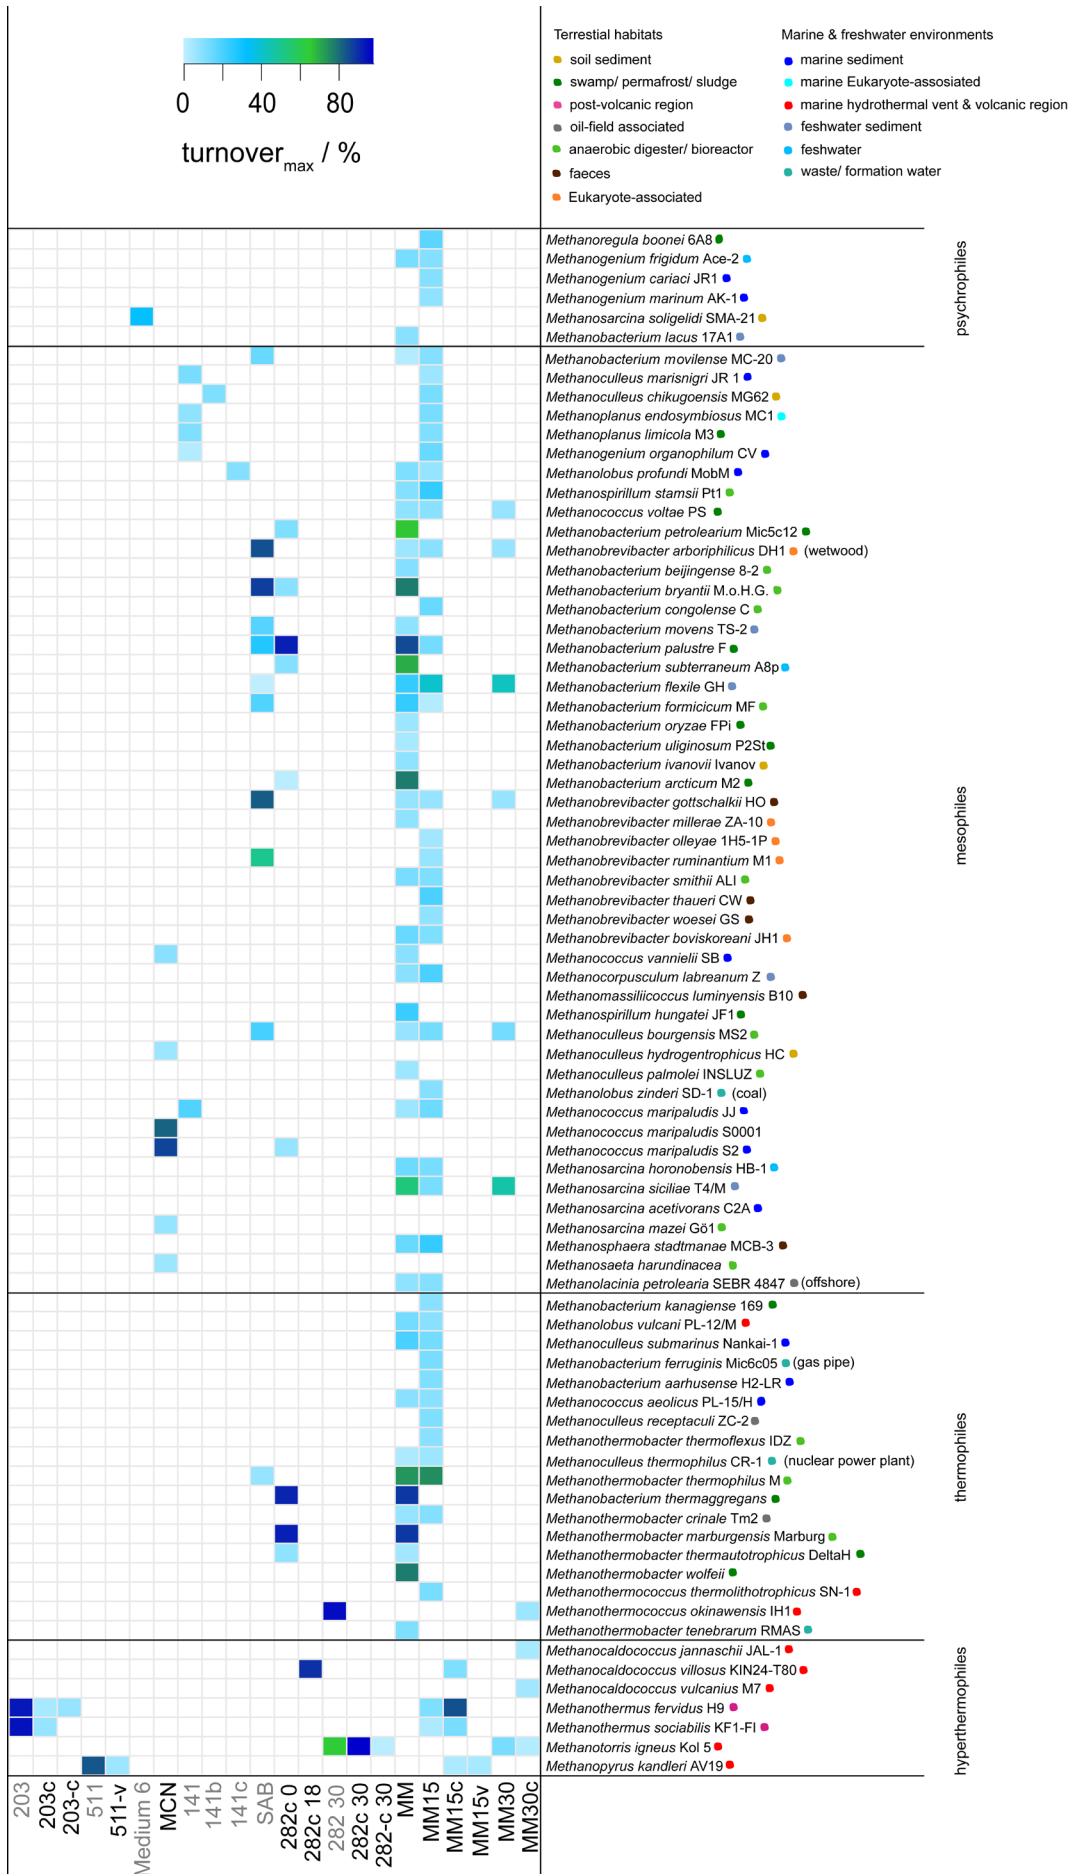

**Fig. S2** Results of the maximum gas conversion ( $\text{turnover}_{\text{max}} / \%$ ) of 80 methanogens in defined and complex media during the multivariate pre-screening. Experiments were performed in closed batch cultivation systems at 2 bar (120mL flasks, 50 mL medium). On the y-axis, methanogens were arranged as groups according to their temperature optimum in psychrophiles, mesophiles, thermophiles, or hyperthermophiles. Methanogens are listed with ascending strain specific temperature optimum from top to bottom. Coloured points next to the strain designation on the y-axis indicate the isolation site of the tested methanogen (terrestrial habitats: golden brown - soil sediment, dark green - swamp/permafrost/sludge, pink - post-volcanic region, grey - oil-field associated, light green - anaerobic digester/ bioreactor, brown - faeces, orange - eukaryote-associated; marine and freshwater environments: bright blue - marine sediment, turquoise - marine eukaryote-associated, red - marine hydrothermal vent and volcanic region, grey blue - freshwater sediment, sky blue - freshwater, green blue - waste/formation water). In total, 22 defined and complex media were tested, but not every strain could be or was cultivated on every medium. Defined and complex media are shown on the x-axis in black and grey fonts, respectively. For each closed batch cultivation, three biological replicates (in some cases, two biological replicates) plus one negative control were used.



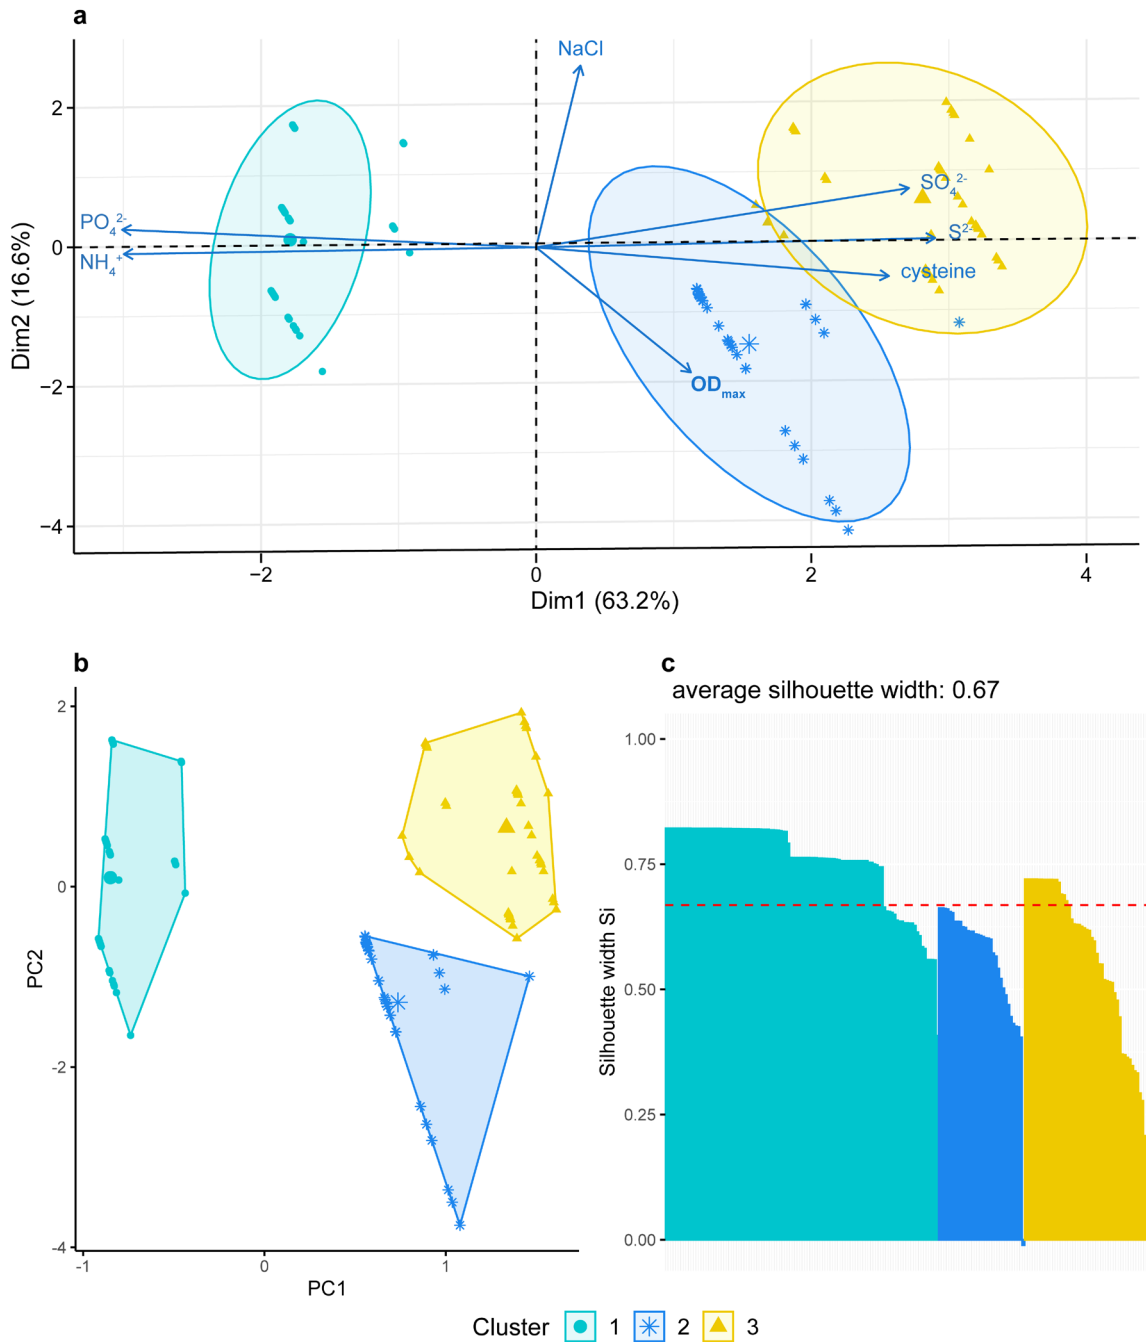

**Fig. S3** k-means cluster analysis of the nutritional demand and associated growth ( $OD_{max}$ ) of tested methanogens. Fig. S3a shows a biplot including the variance of the variables and the corresponding clusters. Fig. S3b illustrates the k-means clusters after the PCA. For the k-means clustering two principle components were used. Fig. S3c shows a silhouette plot (quality of clustering) of the cluster.

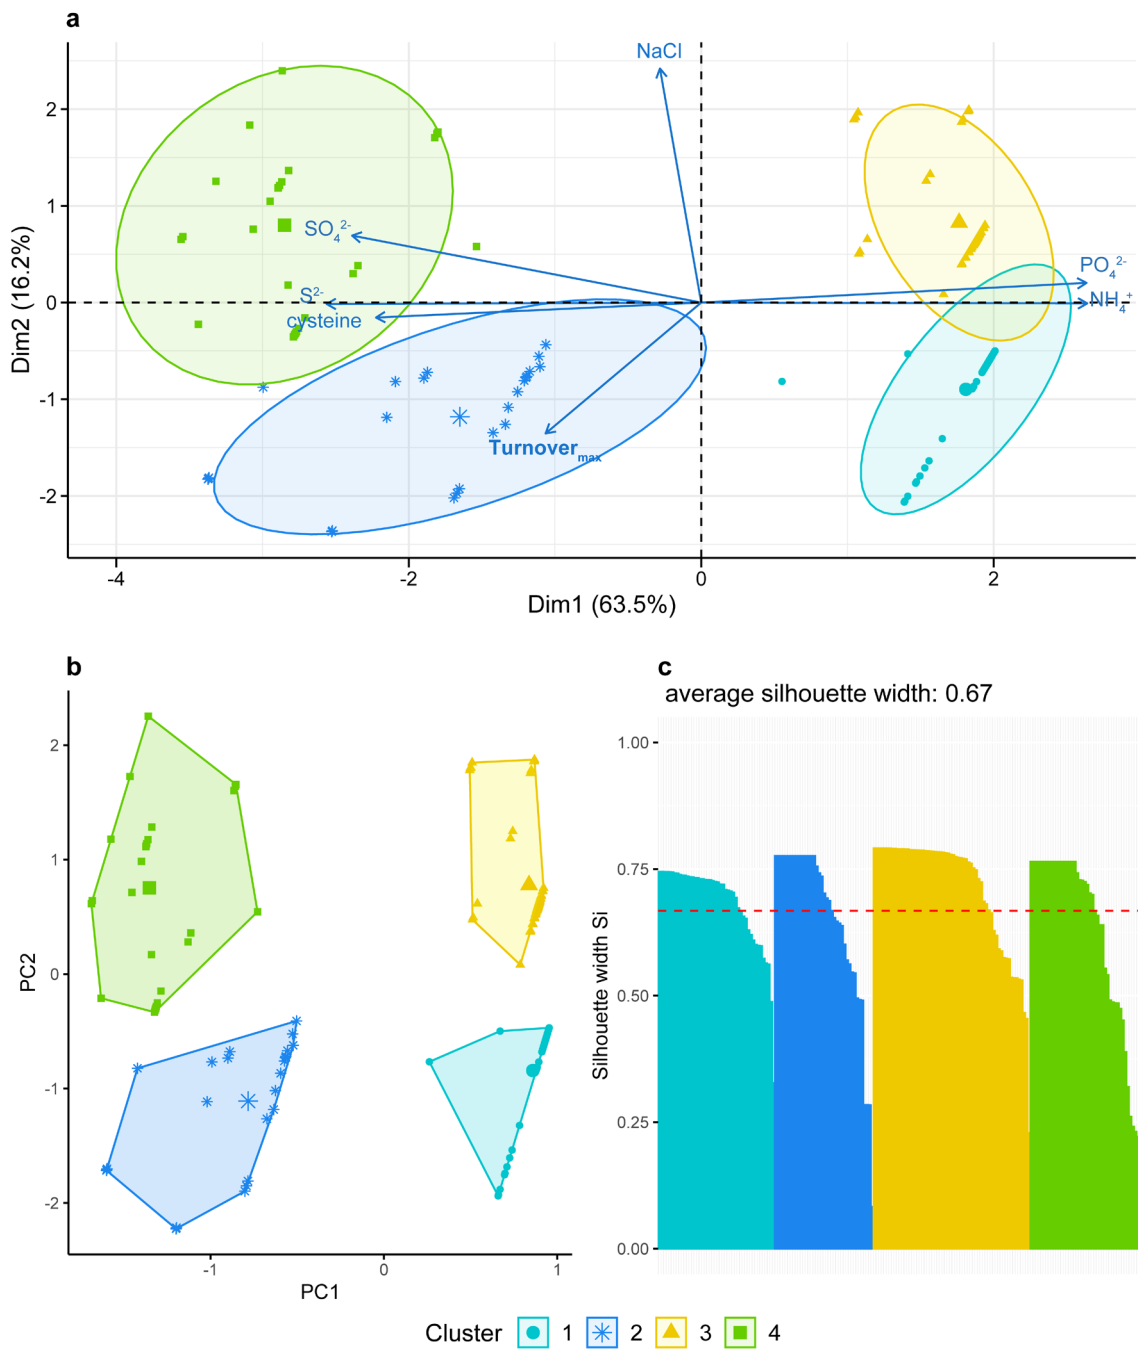

**Fig. S4** k-means cluster analysis of the nutritional demand and associated turnover of the substrates ( $\text{turnover}_{\max}$ ) of tested methanogens. Fig. S4a shows a biplot including the variance of the variables and the corresponding clusters. Fig. S4b illustrates the k-means clusters after the PCA. For the k-means clustering two principle components were used. Fig. S4c shows a silhouette plot (quality of clustering) of the cluster.

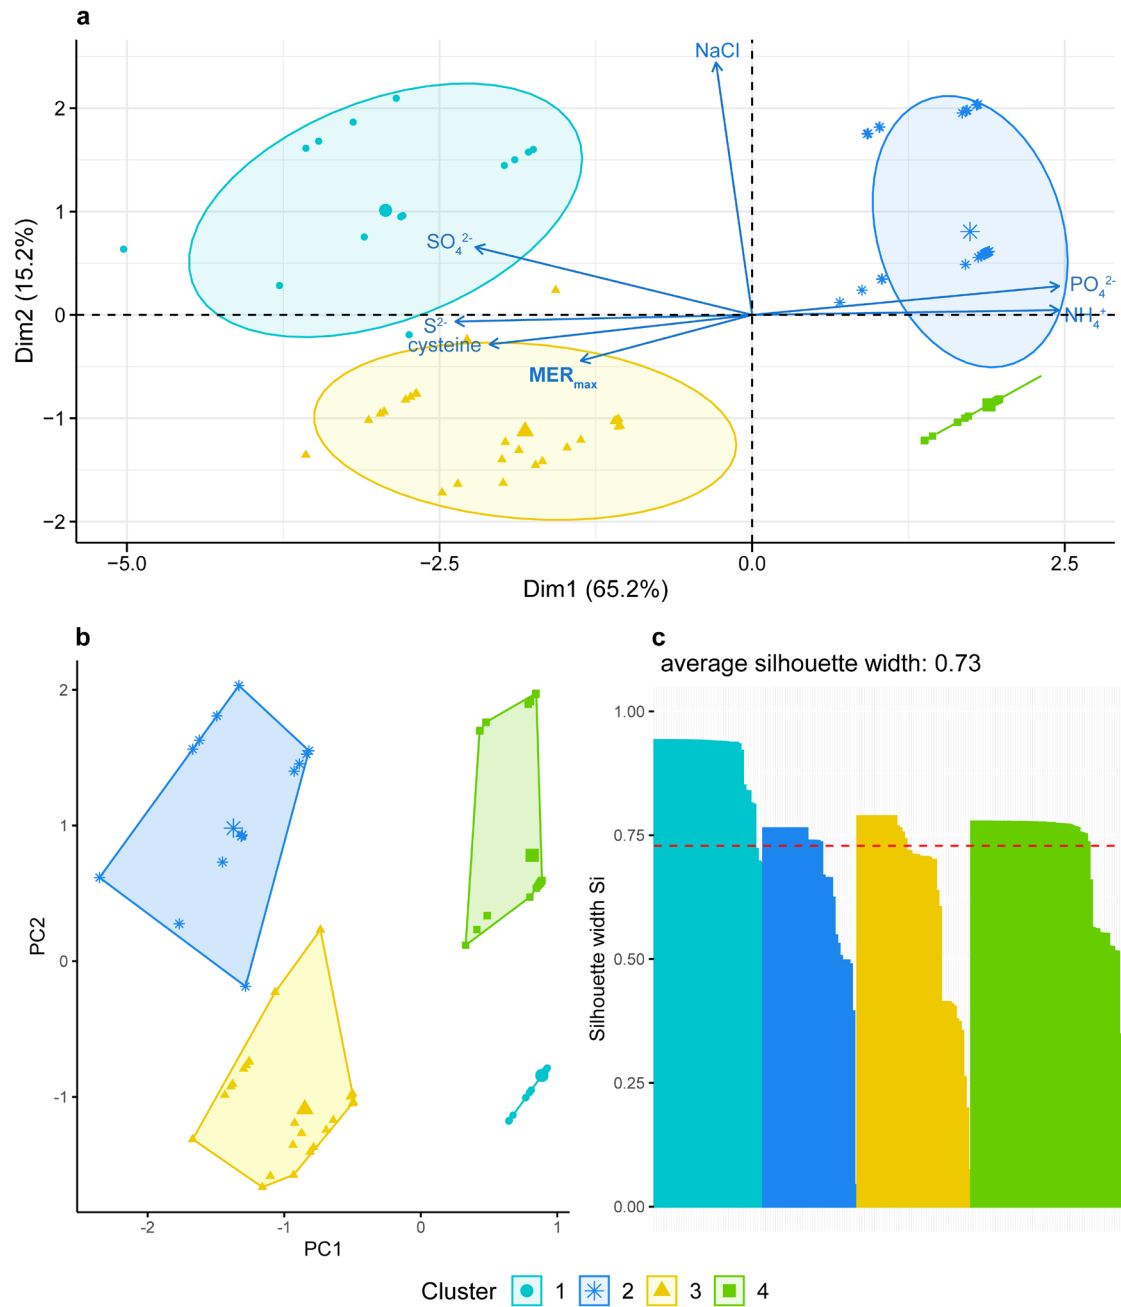

**Fig. S5** k-means cluster analysis of the nutritional demand and associated volumetric  $\text{CH}_4$  production rate ( $\text{MER}_{\max}$ ) of tested methanogens. Fig. S5a shows a biplot including the variance of the variables and the corresponding clusters. Fig. S5b illustrates the k-means clusters after the PCA. For the k-means clustering two principle components were used. Fig. S5c shows a silhouette plot (quality of clustering) of the cluster.

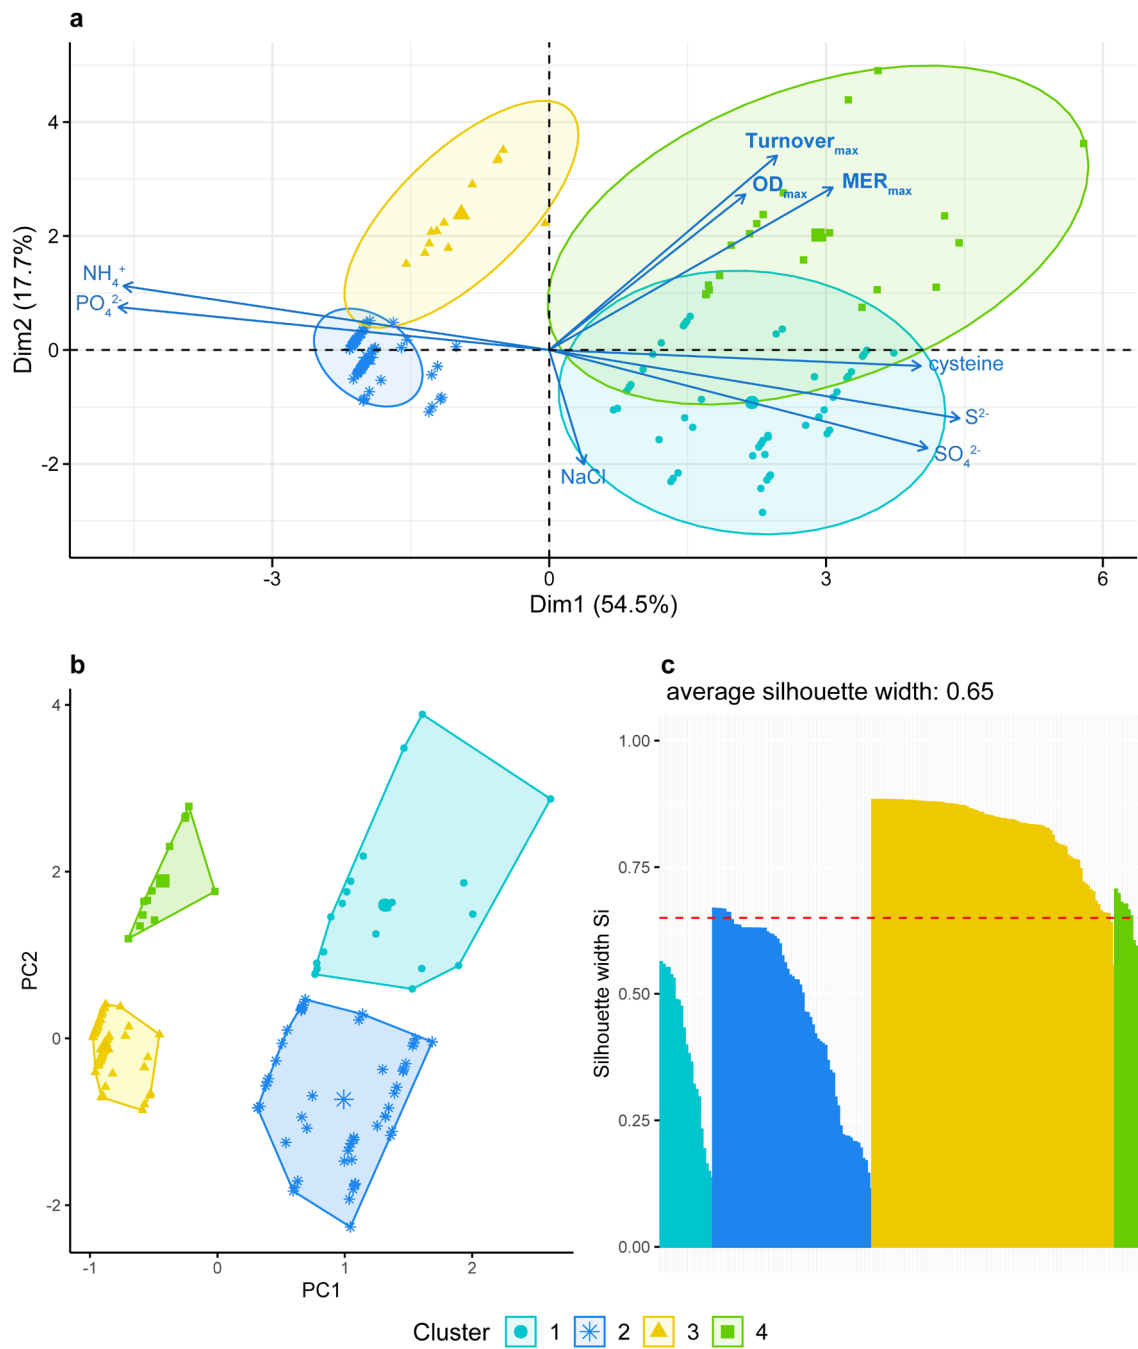

**Fig. S6** k-means cluster analysis of the nutrimental demand and associated growth ( $\text{OD}_{\text{max}}$ ), turnover of substrates ( $\text{turnover}_{\text{max}}$ ), and volumetric  $\text{CH}_4$  production rate ( $\text{MER}_{\text{max}}$ ) of tested methanogens. Fig. S6a shows a biplot including the variance of the variables and the corresponding clusters. Fig. S6b illustrates the k-means clusters after the PCA. For the k-means clustering two principle components were used. Fig. S6c shows a silhouette plot (quality of clustering) of the cluster.

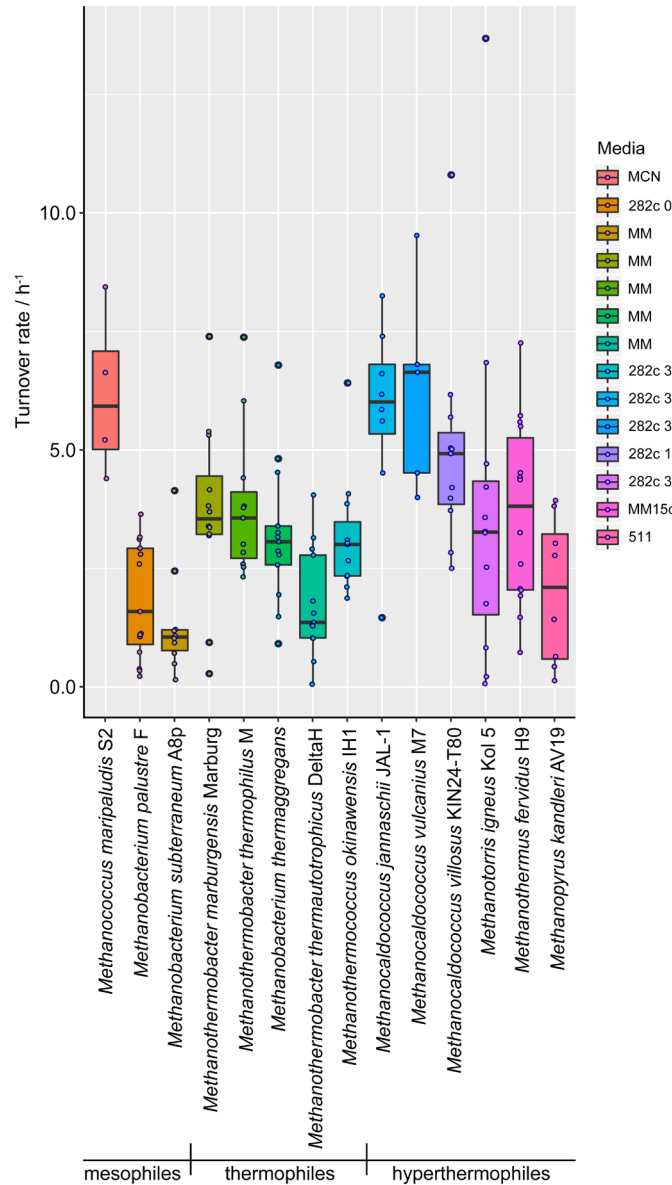

**Fig. S7** Repetitive closed-batch cultivation using high frequency gassing (HFG) for prioritized methanogens at 2 bar in defined medium. All experiments were performed in quadruplicates including a negative control. The turnover rate /  $\text{h}^{-1}$  is shown. Three temperature blocks are distinguished and highlighted from left to right: mesophilic methanogens grown at  $37^\circ\text{C}$  (*Methanococcus maripaludis* S2, *Methanobacterium palustre* F, *Methanobacterium subterraneum* A8p); middle block: five thermophilic strains grown at  $65^\circ\text{C}$  (*Methanothermobacter marburgensis* Marburg, *Methanothermobacter thermophilus* M, *Methanobacterium thermaggrens*, *Methanothermobacter thermautotrophicus* DeltaH, *Methanothermococcus okinawensis* IH1); right block: six hyperthermophilic methanogens (*Methanocaldococcus jannaschii* JAL-1 ( $80^\circ\text{C}$ ), *Methanocaldococcus vulcanius* M7 ( $80^\circ\text{C}$ ), *Methanocaldococcus villosus* KIN24-T80 ( $80^\circ\text{C}$ ), *Methanotorris igneus* Kol 5 ( $85^\circ\text{C}$ ), *Methanothermus fervidus* H9 ( $80^\circ\text{C}$ ), *Methanopyrus kandleri* AV19 ( $98^\circ\text{C}$ )).

|           | Gly <sup>47</sup> | His <sup>207</sup> | Arg <sup>210</sup><br>Arg <sup>211</sup> | Phe <sup>330</sup><br>Tyr <sup>353</sup> | Gln <sup>460</sup> | Phe <sup>463</sup><br>Tyr <sup>464</sup><br>Tyr <sup>466</sup> | Asn <sup>469</sup><br>Cys <sup>522</sup> | Asp <sup>461</sup><br>Ile <sup>522</sup> |                                                                |
|-----------|-------------------|--------------------|------------------------------------------|------------------------------------------|--------------------|----------------------------------------------------------------|------------------------------------------|------------------------------------------|----------------------------------------------------------------|
| VVQEHMAE  | KHS               | RR                 | GF                                       | TDG                                      | FSSOR              | LGFYGYDLQDQCG                                                  |                                          | ALNTE                                    | WP_086637809 <i>Methanatronarchaeum thermophilum</i>           |
| VVQEHMAE  | KHS               | RR                 | GF                                       | TQYA                                     | FSSOR              | LGFYGYDLQDQCG                                                  |                                          | AMNVG                                    | WP_019176774 <i>Methanomassiliococcus luminyensis</i> *        |
| VVQEHMVE  | KHA               | RR                 | GF                                       | TQYA                                     | FSSOR              | LGFYGYDLQDQCG                                                  |                                          | AMNVG                                    | WP_013180513 <i>Methanococcus voltae</i>                       |
| VVQEHMVE  | KHA               | RR                 | GF                                       | TQYA                                     | FSSOR              | LGFYGYDLQDQCG                                                  |                                          | AMNVG                                    | CAA30633 <i>Methanococcus voltae</i> PS*                       |
| VVQEHMVE  | KHA               | RR                 | GF                                       | TQYA                                     | FSSOR              | LGFYGYDLQDQCG                                                  |                                          | AMNVG                                    | AAA72598 <i>Methanococcus vannielii</i>                        |
| VVQEHMVE  | KHA               | RR                 | GF                                       | TQYA                                     | FSSOR              | LGFYGYDLQDQCG                                                  |                                          | AMNVG                                    | ABR54777 <i>Methanococcus vannielii</i> SB*                    |
| VVQEHMVE  | KHA               | RR                 | GF                                       | TQYA                                     | FSSOR              | LGFYGYDLQDQCG                                                  |                                          | AMNVG                                    | WP_011171503 <i>Methanococcus maripaludis</i> *                |
| VVQEHMVE  | KHA               | RR                 | GF                                       | TQYA                                     | FSSOR              | LGFYGYDLQDQCG                                                  |                                          | AMNVG                                    | CAF31115 <i>Methanococcus maripaludis</i> S2* *                |
| VVQEHMVE  | KHA               | RR                 | GF                                       | TQYA                                     | FSSOR              | LGFYGYDLQDQCG                                                  |                                          | AMNVG                                    | WP_146778459 <i>Methanococcus maripaludis</i> *                |
| VVQEHMVE  | KHA               | RR                 | GF                                       | TQYA                                     | FSSOR              | LGFYGYDLQDQCG                                                  |                                          | AMNVG                                    | WP_011977191 <i>Methanococcus maripaludis</i> *                |
| VVQEHMVE  | KHA               | RR                 | GF                                       | TQYA                                     | FSSOR              | LGFYGYDLQDQCG                                                  |                                          | AMNVG                                    | WP_012193868 <i>Methanococcus maripaludis</i> *                |
| VVQEHMVE  | KHA               | RR                 | GF                                       | TQYA                                     | FSSOR              | LGFYGYDLQDQCG                                                  |                                          | AMNVG                                    | WP_011867796 <i>Methanococcus maripaludis</i> *                |
| -----     | ---               | ---                | ---                                      | ---                                      | ---                | ---                                                            | ---                                      | ----                                     | AAL29288 <i>Methanoterris igneus</i> Kol 5* * *                |
| VVQEHMVE  | KHA               | RR                 | GF                                       | TQYA                                     | FSSOR              | LGFYGYDLQDQCG                                                  |                                          | AMNVG                                    | ENN96460 <i>Methanocaldococcus villosus</i> KIN24-T80* *       |
| VVQEHMVE  | KHA               | RR                 | GF                                       | TQYA                                     | FSSOR              | LGFYGYDLQDQCG                                                  |                                          | AMNVG                                    | WP_013099697 <i>Methanocaldococcus infernus</i>                |
| VVQEHMVE  | KHA               | RR                 | GF                                       | TQYA                                     | FSSOR              | LGFYGYDLQDQCG                                                  |                                          | AMNVG                                    | WP_012819563 <i>Methanocaldococcus vulcanius</i> *             |
| VVQEHMVE  | KHA               | RR                 | GF                                       | TQYA                                     | FSSOR              | LGFYGYDLQDQCG                                                  |                                          | AMNVG                                    | WP_010870360 <i>Methanocaldococcus jannaschii</i> * * *        |
| VVQEHMVE  | KHA               | RR                 | GF                                       | TQYA                                     | FSSOR              | LGFYGYDLQDQCG                                                  |                                          | AMNVG                                    | WP_011973976 <i>Methanococcus aeolicus</i> *                   |
| VVQEHMVE  | KHA               | RR                 | GF                                       | TQYA                                     | FSSOR              | LGFYGYDLQDQCG                                                  |                                          | AMNVG                                    | WP_148120072 <i>Methanofervidococcus</i> sp. A16               |
| VVQEHMVE  | KHA               | RR                 | GF                                       | TQYA                                     | FSSOR              | LGFYGYDLQDQCG                                                  |                                          | AMNVG                                    | AEO06926 <i>Methanothermococcus okinawensis</i> IH1* *         |
| VVQEHMVE  | KHA               | RR                 | GF                                       | TQYA                                     | FSSOR              | LGFYGYDLQDQCG                                                  |                                          | AMNVG                                    | WP_067147089 <i>Methanobrevibacter alleyae</i> *               |
| VVQEHMVE  | KHA               | RR                 | GF                                       | TQYA                                     | FSSOR              | LGFYGYDLQDQAG                                                  |                                          | AMNVG                                    | WP_069575111 <i>Methanobrevibacter</i>                         |
| VVQEHMVE  | KHA               | RR                 | GF                                       | TQYA                                     | FSSOR              | LGFYGYDLQDQAG                                                  |                                          | AMNVG                                    | RPF51676 <i>Methanobrevibacter gottschalkii</i> HO*            |
| VVQEHMVE  | KHA               | RR                 | GF                                       | TQYA                                     | FSSOR              | LGFYGYDLQDQCG                                                  |                                          | AMNVG                                    | WP_011954158 <i>Methanobrevibacter</i>                         |
| VVQEHMVE  | KHA               | RR                 | GF                                       | TQYA                                     | FSSOR              | LGFYGYDLQDQCG                                                  |                                          | AMNVG                                    | WP_042694806 <i>Methanobrevibacter oralis</i>                  |
| VVQEHMVE  | KHA               | RR                 | GF                                       | TQYA                                     | FSSOR              | LGFYGYDLQDQCG                                                  |                                          | AMNVG                                    | CAE48306 <i>Methanosphaera stadtmanae</i> MCB-3*               |
| VVQEHMVE  | KHA               | RR                 | GF                                       | TQYA                                     | FSSOR              | LGFYGYDLQDQCG                                                  |                                          | AMNVG                                    | WP_048080940 <i>Methanobacterium</i>                           |
| VVQEHMVE  | KHA               | RR                 | GF                                       | TQYA                                     | FSSOR              | LGFYGYDLQDQCG                                                  |                                          | AMNVG                                    | PAV05908 <i>Methanobacterium bryantii</i> *                    |
| VVQEHMVE  | KHA               | RR                 | GF                                       | TQYA                                     | FSSOR              | LGFYGYDLQDQCG                                                  |                                          | AMNVG                                    | WP_100905456 <i>Methanobacterium</i>                           |
| VVQEHMVE  | KHA               | RR                 | GF                                       | TQYA                                     | FSSOR              | LGFYGYDLQDQCG                                                  |                                          | AMNVG                                    | AUB55475 <i>Methanobacterium subterraneum</i> * *              |
| VVQEHMVE  | KHA               | RR                 | GF                                       | TQYA                                     | FSSOR              | LGFYGYDLQDQCG                                                  |                                          | AMNVG                                    | WP_023992931 <i>Methanobacterium</i> sp. MB1                   |
| VVQEHMVE  | KHA               | RR                 | GF                                       | TQYA                                     | FSSOR              | LGFYGYDLQDQCG                                                  |                                          | AMNVG                                    | WP_004029250 <i>Methanobacterium formicicum</i> *              |
| VVQEHMVE  | KHA               | RR                 | GF                                       | TQYA                                     | FSSOR              | LGFYGYDLQDQCG                                                  |                                          | AMNVG                                    | EKF86694 <i>Methanobacterium formicicum</i> PP1                |
| VVQEHMVE  | KHA               | RR                 | GF                                       | TQYA                                     | FSSOR              | LGFYGYDLQDQCG                                                  |                                          | AMNVG                                    | WP_048085732 <i>Methanobacterium formicicum</i> *              |
| VVQEHMVE  | KHA               | RR                 | GF                                       | TQYA                                     | FSSOR              | LGFYGYDLQDQCG                                                  |                                          | AMNVG                                    | WP_048072649 <i>Methanobacterium formicicum</i> *              |
| VVQEHMVE  | KHA               | RR                 | GF                                       | TQYA                                     | FSSOR              | LGFYGYDLQDQCG                                                  |                                          | AMNVG                                    | WP_074359401 <i>Methanothermobacter wolfeii</i> *              |
| VVQEHMVE  | KHA               | RR                 | GF                                       | TQYA                                     | FSSOR              | LGFYGYDLQDQCG                                                  |                                          | AMNVG                                    | WP_010876753 <i>Methanothermobacter thermautotrophicus</i> * * |
| VVQEHMVE  | KHA               | RR                 | GF                                       | TQYA                                     | FSSOR              | LGFYGYDLQDQCG                                                  |                                          | AMNVG                                    | WP_048175703 <i>Methanothermobacter</i> spp.                   |
| VVQEHMVE  | KHA               | RR                 | GF                                       | TQYA                                     | FSSOR              | LGFYGYDLQDQCG                                                  |                                          | AMNVG                                    | WP_013296302 <i>Methanothermobacter</i> spp.                   |
| VVQEHMVE  | KHA               | RR                 | GF                                       | TQYA                                     | FSSOR              | LGFYGYDLQDQCG                                                  |                                          | AMNVG                                    | WP_018154763 <i>Methanothermococcus thermolithotrophicus</i> * |
| VVQEHMVE  | KHA               | RR                 | GF                                       | TQYA                                     | FSSOR              | LGFYGYDLQDQCG                                                  |                                          | AMNVG                                    | WP_048115624 <i>Methanoterris formicicus</i>                   |
| VVQEHMVE  | KHA               | RR                 | GF                                       | TQYA                                     | FSSOR              | LGFYGYDLQDQCG                                                  |                                          | AMNVG                                    | WP_015733272 <i>Methanocaldococcus vulcanius</i> * *           |
| VVQEHMVE  | KHA               | RR                 | GF                                       | TQYA                                     | FSSOR              | LGFYGYDLQDQCG                                                  |                                          | AMNVG                                    | WP_012980029 <i>Methanocaldococcus</i> sp. FS406-22            |
| VVQEHMVE  | KHA               | RR                 | GF                                       | TQYA                                     | FSSOR              | LGFYGYDLQDQCG                                                  |                                          | AMNVG                                    | WP_011019025 <i>Methanopyrus kandleri</i> * *                  |
| VVQEHMVE  | KHA               | RR                 | GF                                       | TQYA                                     | FSSOR              | LGFYGYDLQDQCG                                                  |                                          | AMNVG                                    | WP_088335801 <i>Methanopyrus</i> sp. KOL6                      |
| VQIQEHMVE | KHA               | RR                 | GF                                       | TQYA                                     | FSSOR              | LGFYGYDLQDQCG                                                  |                                          | AMNVG                                    | WP_067147710 <i>Methanobrevibacter alleyae</i> *               |
| AVQEHMVE  | KHA               | RR                 | GF                                       | TQYA                                     | FSSOR              | LGFYGYDLQDQCG                                                  |                                          | AMNVG                                    | WP_012956722 <i>Methanobrevibacter ruminantium</i>             |
| AVQEHMVE  | KHA               | RR                 | GF                                       | TQYA                                     | FSSOR              | LGFYGYDLQDQCG                                                  |                                          | AMNVG                                    | ADC47774 <i>Methanobrevibacter ruminantium</i> M1*             |
| VVQEHMVE  | KHA               | RR                 | GF                                       | TQYA                                     | FSSOR              | LGFYGYDLQDQCG                                                  |                                          | AMNVG                                    | WP_116669466 <i>Methanobrevibacter woesei</i> *                |
| VVQEHMVE  | KHA               | RR                 | GF                                       | TQYA                                     | FSSOR              | LGFYGYDLQDQCG                                                  |                                          | AMNVG                                    | WP_011954235 <i>Methanobrevibacter</i> spp.                    |
| VVQEHMVE  | KHA               | RR                 | GF                                       | TQYA                                     | FSSOR              | LGFYGYDLQDQCG                                                  |                                          | AMNVG                                    | WP_049780206 <i>Methanobrevibacter smithii</i> *               |
| VVQEHMVE  | KHA               | RR                 | GF                                       | TQYA                                     | FSSOR              | LGFYGFDLQDQCG                                                  |                                          | AMNVG                                    | WP_063720576 <i>Methanobrevibacter oralis</i>                  |
| VVQEHMVE  | KHA               | RR                 | GF                                       | TQYA                                     | FSSOR              | LGFYGFDLQDQCG                                                  |                                          | AMNVG                                    | WP_149732200 <i>Methanobrevibacter millerae</i> *              |
| VVQEHMVE  | KHA               | RR                 | GF                                       | TQYA                                     | FSSOR              | LGFYGFDLQDQCG                                                  |                                          | AMNVG                                    | WP_116592380 <i>Methanobrevibacter thaueri</i> *               |
| VVQEHMVE  | KHA               | RR                 | GF                                       | TQYA                                     | FSSOR              | LGFYGFDLQDQCG                                                  |                                          | AMNVG                                    | WP_058739998 <i>Methanobrevibacter millerae</i> *              |
| VVQEHMVE  | KHA               | RR                 | GF                                       | TQYA                                     | FSSOR              | LGFYGFDLQDQCG                                                  |                                          | AMNVG                                    | WP_069575737 <i>Methanobrevibacter</i> spp.                    |
| VVQEHMVE  | KHA               | RR                 | GF                                       | TQYA                                     | FSSOR              | LGFYGYDLQDQCG                                                  |                                          | AMNVG                                    | WP_040682084 <i>Methanobrevibacter boviskoreani</i> *          |
| VVQEHMVE  | KHA               | RR                 | GF                                       | TQYA                                     | FSSOR              | LGFYGYDLQDQCG                                                  |                                          | AMNVG                                    | WP_016359092 <i>Methanobrevibacter</i> sp. AbM4                |
| VVQEHMVE  | KHA               | RR                 | GF                                       | TQYA                                     | FSSOR              | LGFYGYDLQDQCG                                                  |                                          | AMNVG                                    | WP_067089747 <i>Methanobrevibacter curvatus</i>                |
| VVQEHMVE  | KHA               | RR                 | GF                                       | TQYA                                     | FSSOR              | LGFYGYDLQDQCG                                                  |                                          | AMNVG                                    | WP_066972991 <i>Methanobrevibacter filiformis</i>              |
| VVQEHMVE  | KHA               | RR                 | GF                                       | TQYA                                     | FSSOR              | LGFYGYDLQDQCG                                                  |                                          | AMNVG                                    | WP_080459572 <i>Methanobrevibacter arboriphilus</i> *          |
| VVQEHMVE  | KHA               | RR                 | GF                                       | TQYA                                     | FSSOR              | LGFYGYDLQDQCG                                                  |                                          | AMNVG                                    | WP_054834881 <i>Methanobrevibacter arboriphilus</i> *          |
| VVQEHMVE  | KHA               | RR                 | GF                                       | TQYA                                     | FSSOR              | LGFYGYDLQDQCG                                                  |                                          | AMNVG                                    | WP_013413861 <i>Methanotherms fervidus</i> * *                 |
| -----     | ---               | ---                | GF                                       | TQYA                                     | FSSOR              | LGFYGYDLQDQCG                                                  |                                          | -----                                    | AAQ18233 <i>Methanotherms sociabilis</i> *                     |
| -----     | ---               | ---                | GF                                       | TQYA                                     | FSSOR              | LGFYGYDLQDQCG                                                  |                                          | AMNV                                     | AEI26141 <i>Methanothermobacter crinale</i> *                  |
| VVQEHMVE  | KHA               | RR                 | GF                                       | TQYA                                     | FSSOR              | LGFYGYDLQDQCG                                                  |                                          | AMNVG                                    | RAO79542 <i>Methanothermobacter tenebrarum</i> *               |
| VVQEHMVE  | KHA               | RR                 | GF                                       | TQYA                                     | FSSOR              | LGFYGYDLQDQCG                                                  |                                          | -----                                    | BAI67101 <i>Methanobacterium oryzae</i> *                      |
| VVQEHMVE  | KHA               | RR                 | GF                                       | TQYA                                     | FSSOR              | LGFYGYDLQDQCG                                                  |                                          | AMNVG                                    | WP_048081846 <i>Methanobacterium</i> spp.                      |
| VVQEHMVE  | KHA               | RR                 | GF                                       | TQYA                                     | FSSOR              | LGFYGYDLQDQCG                                                  |                                          | -----                                    | BAI67100 <i>Methanobacterium ivanovii</i> *                    |
| VVQEHMVE  | KHA               | RR                 | GF                                       | TQYA                                     | FSSOR              | LGFYGYDLQDQCG                                                  |                                          | -----                                    | BAI67104 <i>Methanobacterium uliginosum</i> *                  |
| VVQEHMVE  | KHA               | RR                 | GF                                       | TQYA                                     | FSSOR              | LGFYGYDLQDQCG                                                  |                                          | -----                                    | ADM52196 <i>Methanobacterium flexile</i> *                     |
| -----     | ---               | ---                | GF                                       | TQYA                                     | FSSOR              | LGFYGYDLQDQCG                                                  |                                          | -----                                    | AAR27839 <i>Methanobacterium aarhusense</i> *                  |
| -----     | ---               | ---                | GF                                       | TQYA                                     | FSSOR              | LGFYGYDLQDQCG                                                  |                                          | A                                        | ABO93182 <i>Methanobacterium beijingense</i> *                 |
| VVQEHMVE  | KHA               | RR                 | GF                                       | TQYA                                     | FSSOR              | LGFYGYDLQDQCG                                                  |                                          | AMNVG                                    | WP_147671448 <i>Methanothermobacter</i> sp. KEPCO-1            |
| -----     | ---               | ---                | GF                                       | TQYA                                     | FSSOR              | LGFYGYDLQDQCG                                                  |                                          | -----                                    | AAQ18236 <i>Methanobacterium thermaggregans</i> * *            |
| -----     | ---               | ---                | GF                                       | TQYA                                     | FSSOR              | LGFYGYDLQDQCG                                                  |                                          | -----                                    | AAQ18238 <i>Methanothermobacter thermophilus</i> * *           |
| VVQEHMVE  | KHA               | RR                 | GF                                       | TQYA                                     | FSSOR              | LGFYGYDLQDQCG                                                  |                                          | AMNVG                                    | WP_160322962 <i>Methanothermobacter</i> sp. THM-2              |
| VVQEHMVE  | KHA               | RR                 | GF                                       | TQYA                                     | FSSOR              | LGFYGYDLQDQCG                                                  |                                          | AMNVG                                    | WP_074359432 <i>Methanothermobacter wolfeii</i> *              |
| VVQEHMVE  | KHA               | RR                 | GF                                       | TQYA                                     | FSSOR              | LGFYGYDLQDQCG                                                  |                                          | AMNVG                                    | WP_013296337 <i>Methanothermobacter marburgensis</i> * *       |
| VVQEHMVE  | KHA               | RR                 | GF                                       | TQYA                                     | FSSOR              | LGFYGYDLQDQCG                                                  |                                          | AMNVG                                    | WP_115891951 <i>Methanothermobacter defluvi</i>                |
| VVQEHMVE  | KHA               | RR                 | GF                                       | TQYA                                     | FSSOR              | LGFYGYDLQDQCG                                                  |                                          | AMNVG                                    | WP_048175731 <i>Methanothermobacter</i> sp. CaT2               |
| -----     | ---               | ---                | GF                                       | TQYA                                     | FSSOR              | LGFYGYDLQDQCG                                                  |                                          | -----                                    | AAQ21198 <i>Methanothermobacter thermoflexus</i> *             |
| -----     | ---               | ---                | GF                                       | TQYA                                     | FSSOR              | LGFYGYDLQDQCG                                                  |                                          | -----                                    | ADM52195 <i>Methanobacterium movens</i> *                      |
| VVQEHMVE  | KHA               | RR                 | GF                                       | TQYA                                     | FSSOR              | LGFYGYDLQDQCG                                                  |                                          | AMNVG                                    | WP_048191628 <i>Methanobacterium</i> sp. SMA-27                |
| VVQEHMVE  | KHA               | RR                 | GF                                       | TQYA                                     | FSSOR              | LGFYGYDLQDQCG                                                  |                                          | AMNVG                                    | WP_013643956 <i>Methanobacterium lacus</i> *                   |
| VVQEHMVE  | KHA               | RR                 | GF                                       | TQYA                                     | FSSOR              | LGFYGYDLQDQCG                                                  |                                          | AMNVG                                    | SCG86533 <i>Methanobacterium congolense</i> *                  |
| VVQEHMVE  | KHA               | RR                 | GF                                       | TQYA                                     | FSSOR              | LGFYGYDLQDQCG                                                  |                                          | AMNVG                                    | WP_023992801 <i>Methanobacterium</i> sp. MB1                   |
| VVQEHMVE  | KHA               | RR                 | GF                                       | TQYA                                     | FSSOR              | LGFYGYDLQDQCG                                                  |                                          | -----                                    | BAI67102 <i>Methanobacterium palustre</i> * *                  |
| -----     | ---               | ---                | GF                                       | TQYA                                     | FSSOR              | LGFYGYDLQDQCG                                                  |                                          | -----                                    | BAI94570 <i>Methanobacterium kangjense</i> *                   |
| VVQEHMVE  | KHA               | RR                 | GF                                       | TQYA                                     | FSSOR              | LGFYGYDLQDQCG                                                  |                                          | -----                                    | BAI67094 <i>Methanobacterium ferruginis</i> *                  |

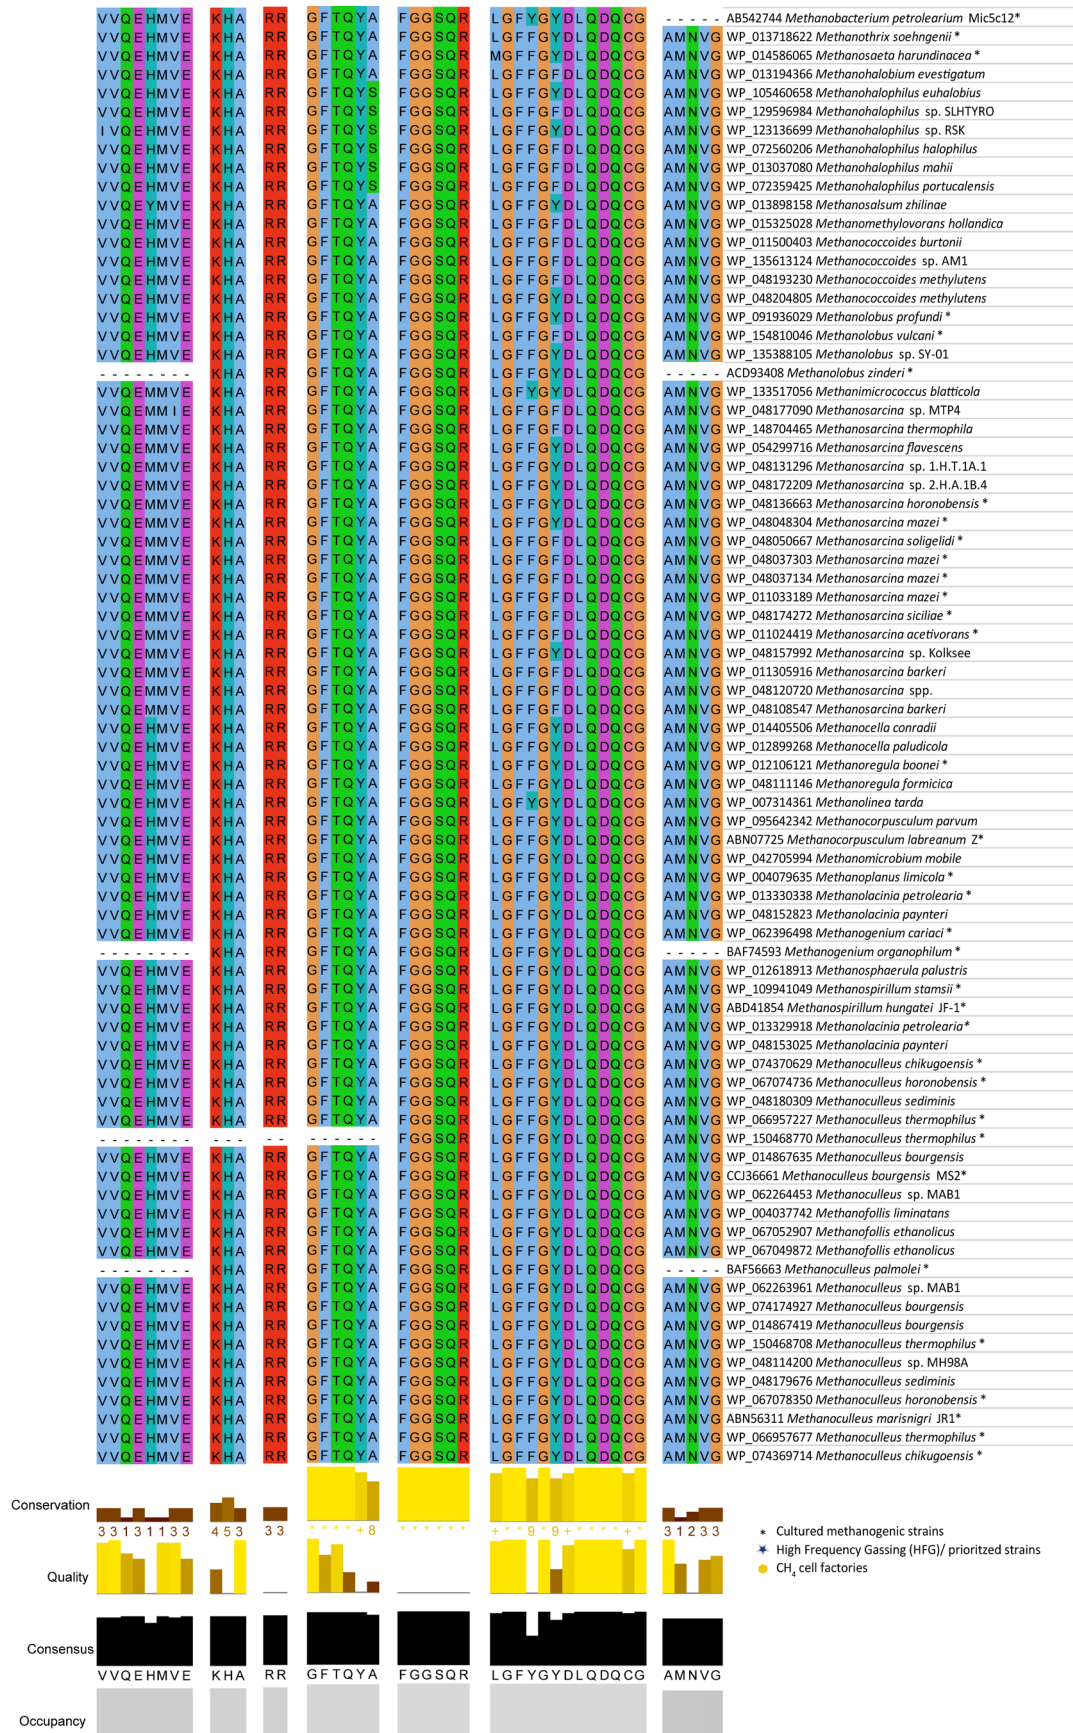

**Fig. S8** Amino acid conservation within alpha subunit of the methyl-coenzyme M reductase (MCR, coenzyme-B sulfoethylthiotransferase). Blastp (Refseq, query: *M. marburgensis* Marburg, GenBank: ADL59127.1) and UniProtK data. Positions according to <sup>3,4</sup>.

As it was shown by Borrel *et al.* 2019, *Methanonatronarchaeum thermophilum* uses asparagine instead of tyrosine on position 333 (Tyr<sup>a333</sup>) and threonine instead of Val<sup>a482</sup>. *Methanobrevibacter gottschalkii* shows an amino acid exchange from Cys<sup>a452</sup> to alanine and *Methanobacterium palustre* shows a deletion on that position indicated with X, see **Fig. S8**. It seems like, the Arg<sup>334</sup> is quite conserved, but some methanogens use glycine (*Methanonatronarchaeum thermophilum*, *Methanobacterium movens*, *Methanobacterium congolense*) and serine (*Methanohalophilus* spp.) instead. *Methanosaeta harundinacea* uses methionine instead of lysine on position 441. In *M. kandleri*, an alanine replaces asparagine on position 447.



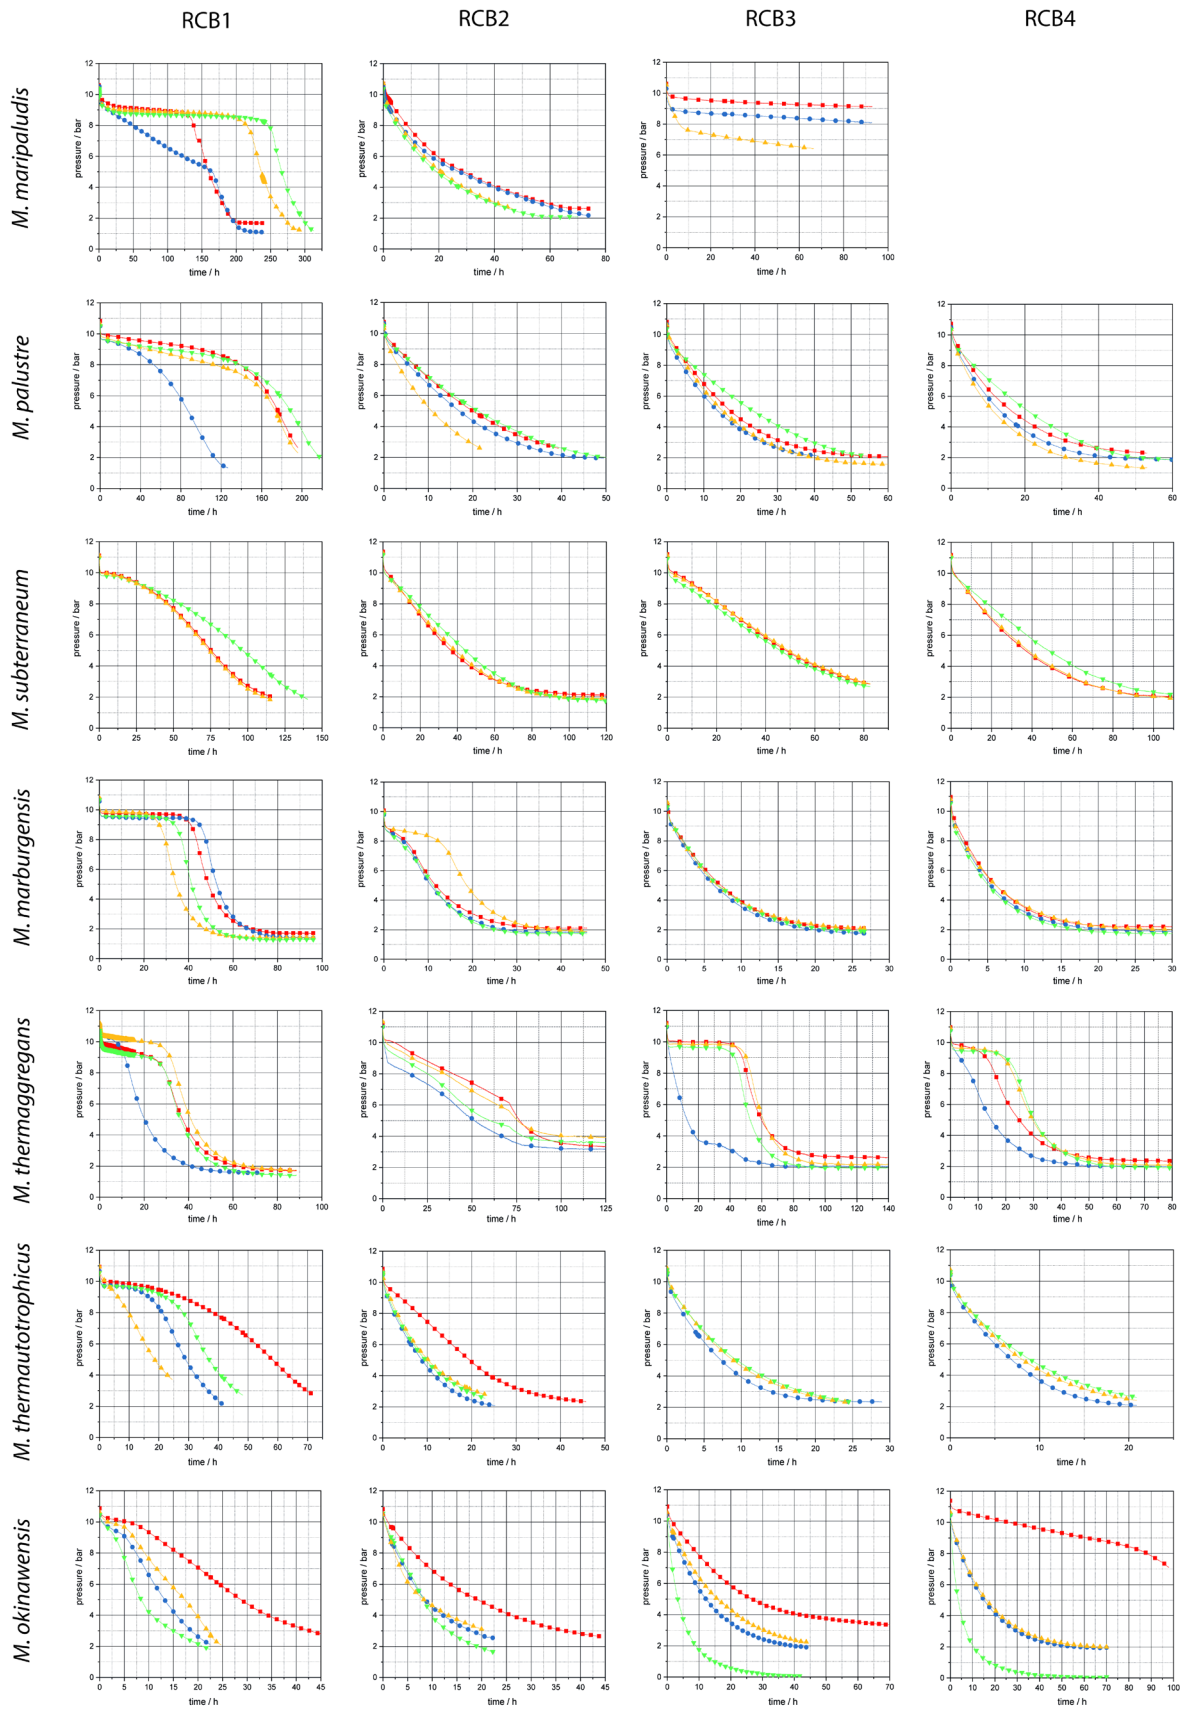

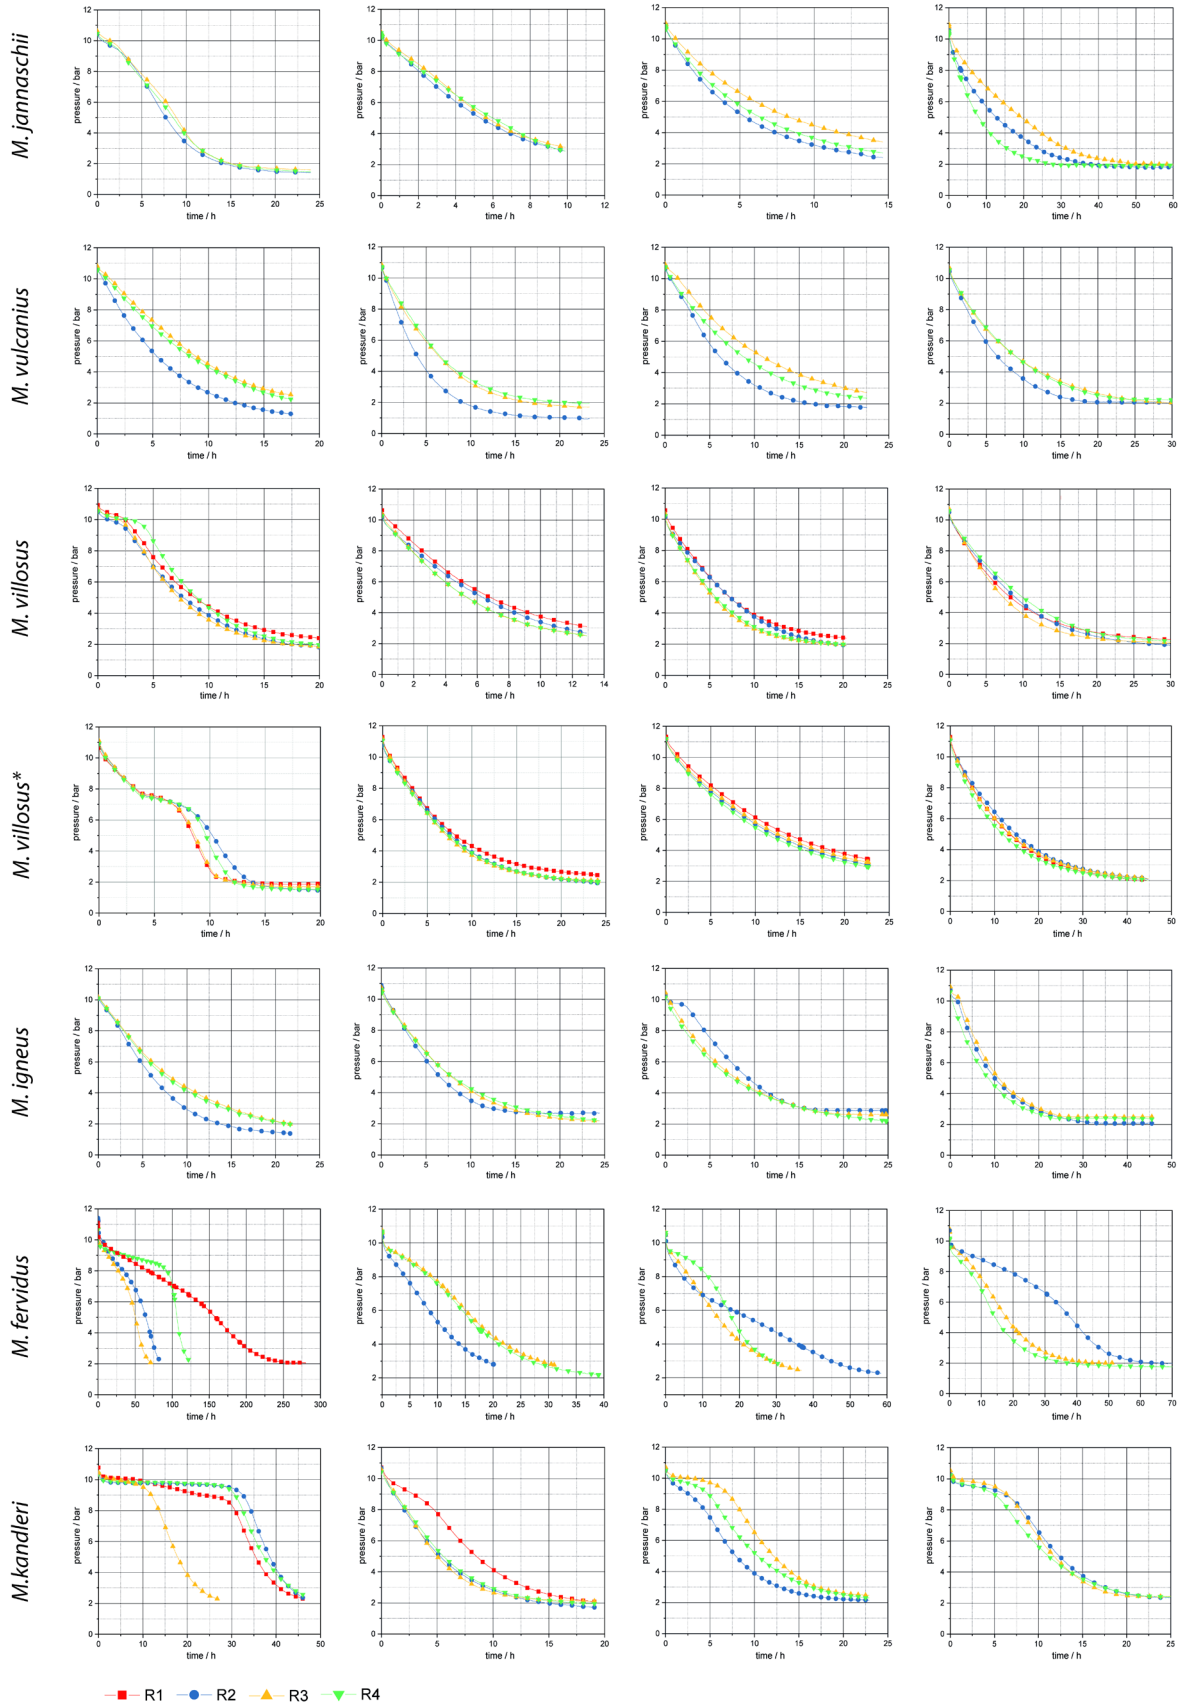

**Fig. S9** Substrate uptake kinetics of twelve methanogens in RCB cultivation mode in SBRS at 10 bar.

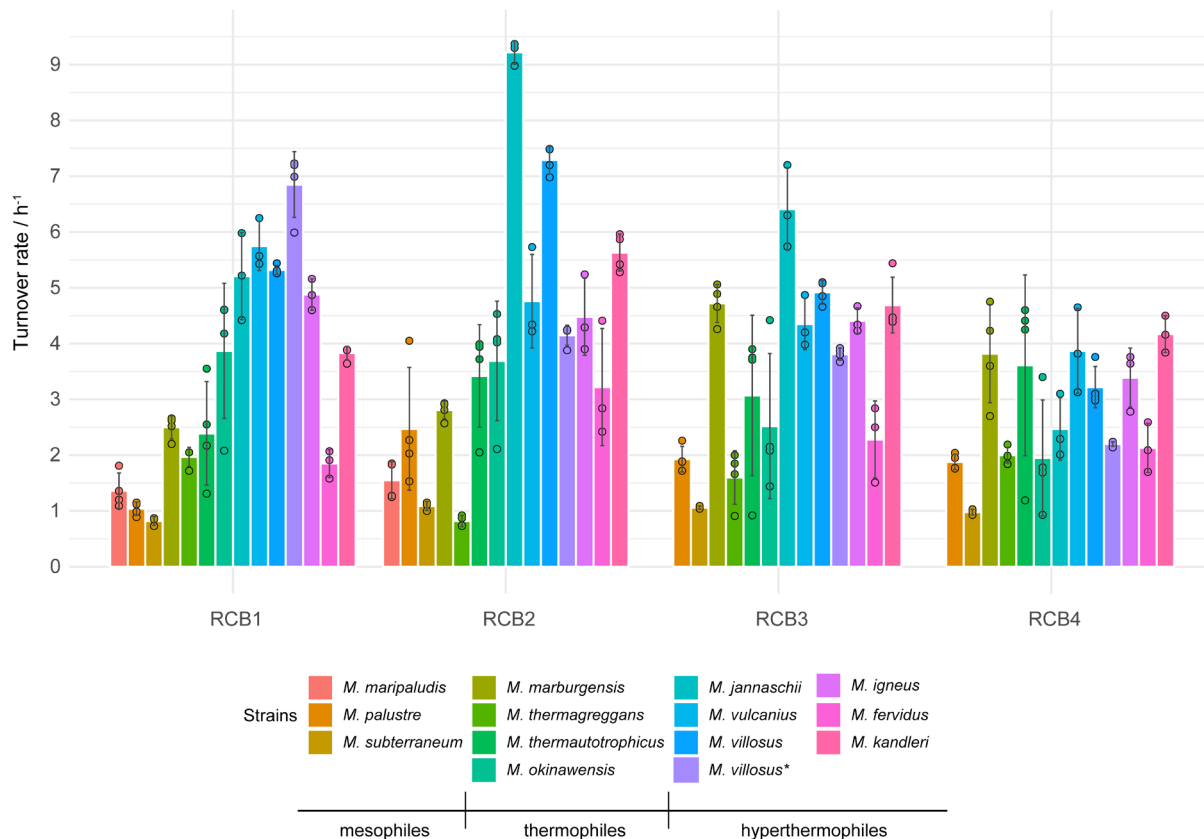

**Fig. S10** Repetitive closed batch (RCB) high pressure cultivations of prioritized methanogens in the simultaneous bioreactor system (SBRS) at 10 bar H<sub>2</sub>/CO<sub>2</sub> (4:1) atmosphere. All experiments were performed in quadruplicates in the SBRS system<sup>5</sup>. The principle of the cultivation was to repressurize each of the bioreactors to 10 bar after full headspace gas conversion. RCB1, RCB2, RCB3, and RCB4 indicate results from individual and successive closed batch headspace gas conversions. The turnover rate / h<sup>-1</sup> is shown. Legend: the left block indicates mesophilic methanogens grown at 37°C (*Methanococcus maripaludis* S2, *Methanobacterium palustre* F, *Methanobacterium subterraneum* A8p); the middle block shows the thermophilic methanogens grown at 65°C (*Methanothermobacter marburgensis* Marburg, *Methanobacterium thermaggregans*, *Methanothermobacter thermautotrophicus* DeltaH, *Methanothermococcus okinawensis* IH1); the right block shows hyperthermophilic methanogens (*Methanocaldococcus jannaschii* JAL-1(80°C), *Methanocaldococcus vulcanius* M7 (80°C), *Methanocaldococcus villosus* KIN24-T80 (80°C), *Methanocaldococcus villosus* KIN24-T80\*-grown on 282c 18\_E medium (80°C), *Methanotorris igneus* Kol 5 (85°C), *Methanothermus fervidus* H9 (80°C), *Methanopyrus kandleri* AV19 (98°C)).

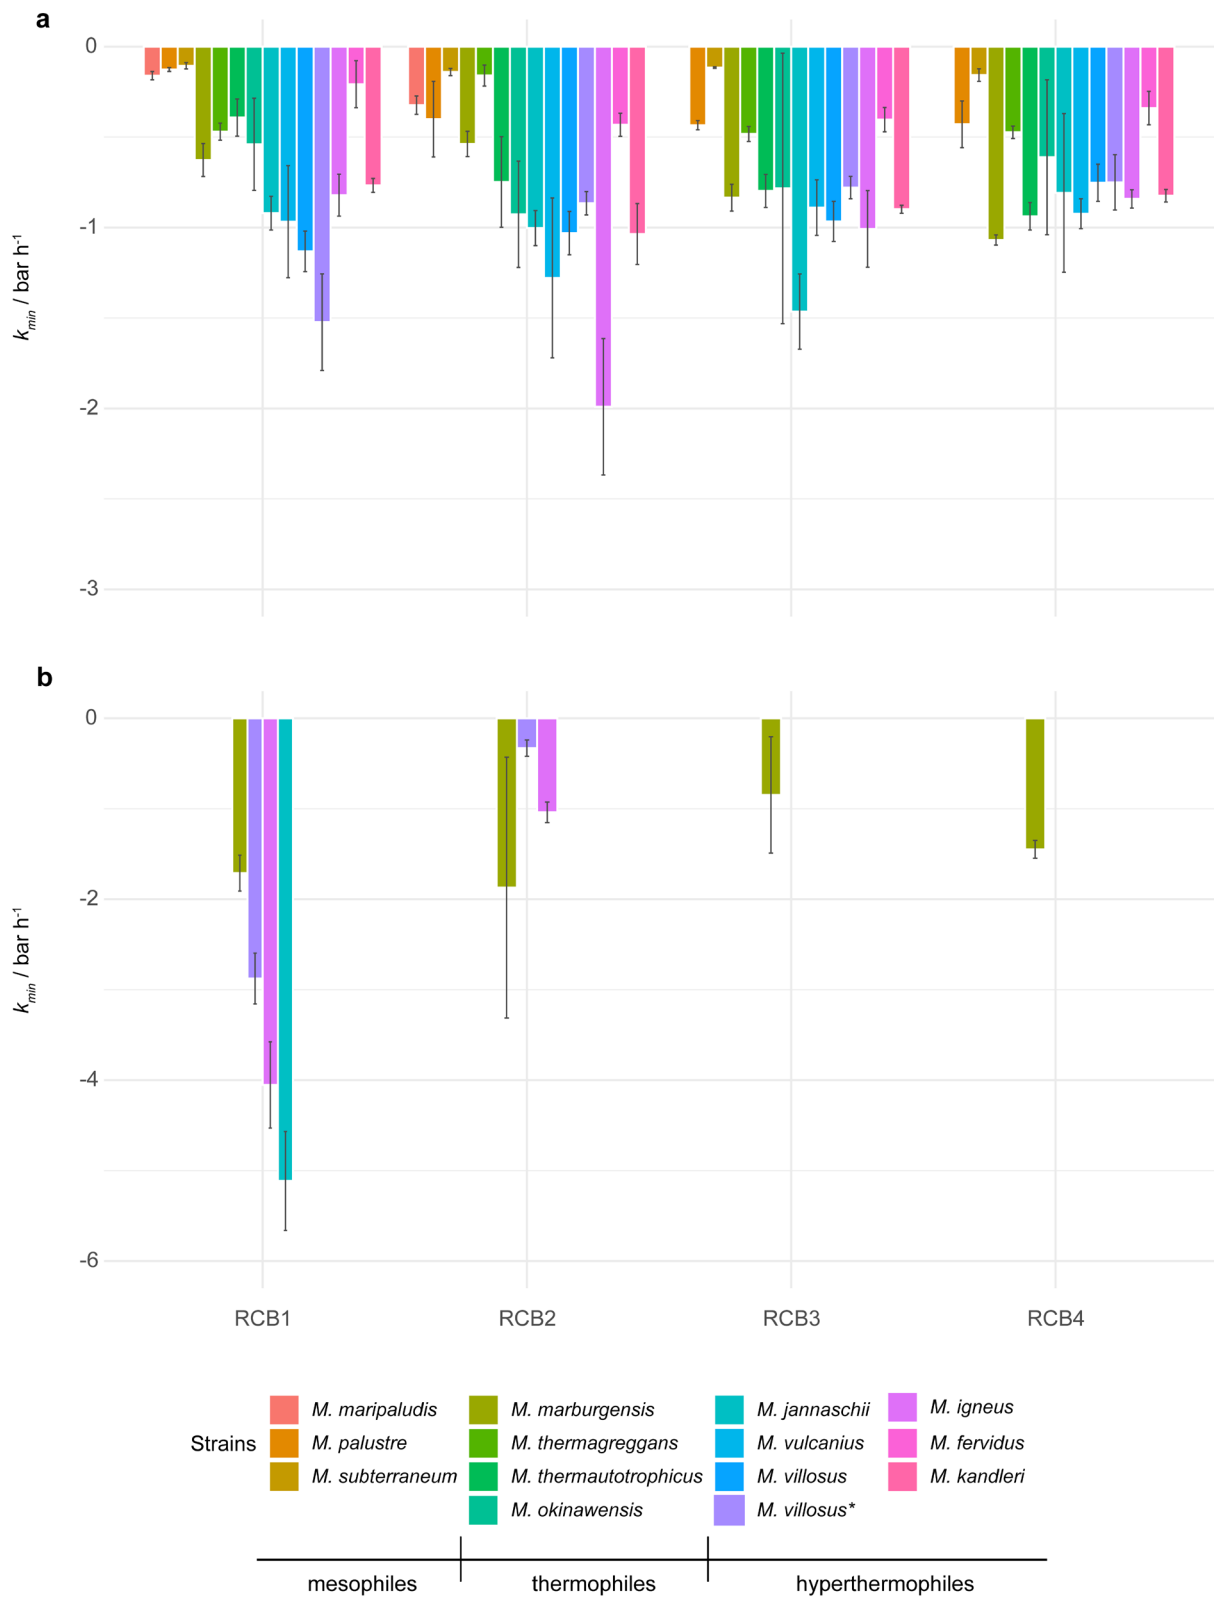

**Fig. S11** Maximum negative slope  $k_{min} / \text{bar h}^{-1}$  of RCB cultivations in the SBRS at a) 10 bar and b) 50 bar.

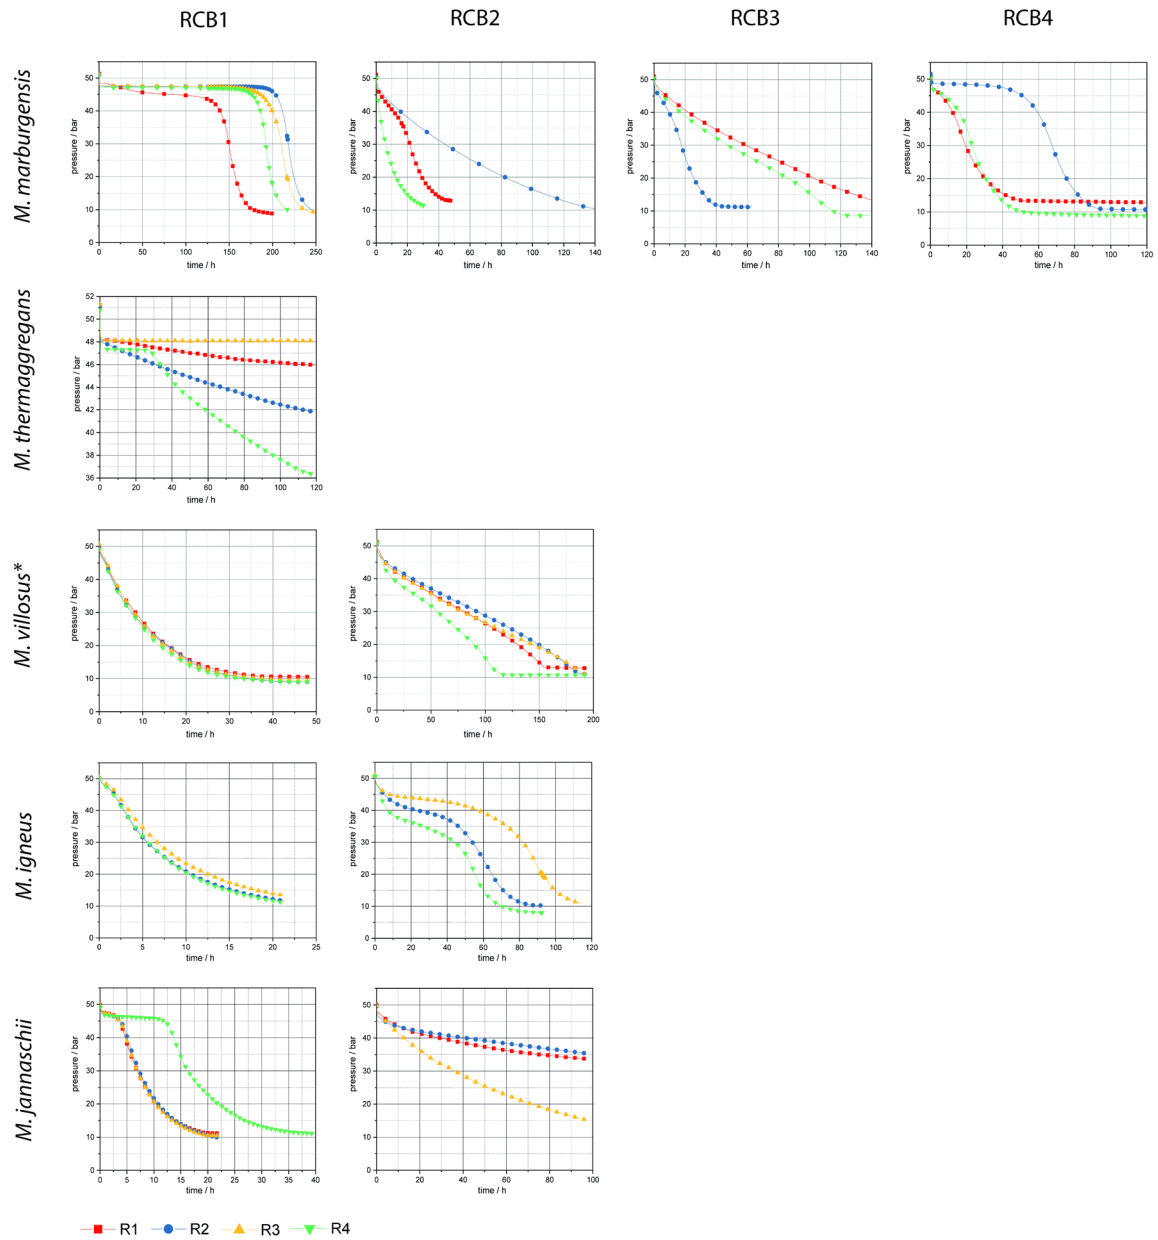

Fig. S12 Substrate uptake kinetics showing repetitive closed batch (RCB) cultivations in the SBRS at 50 bar

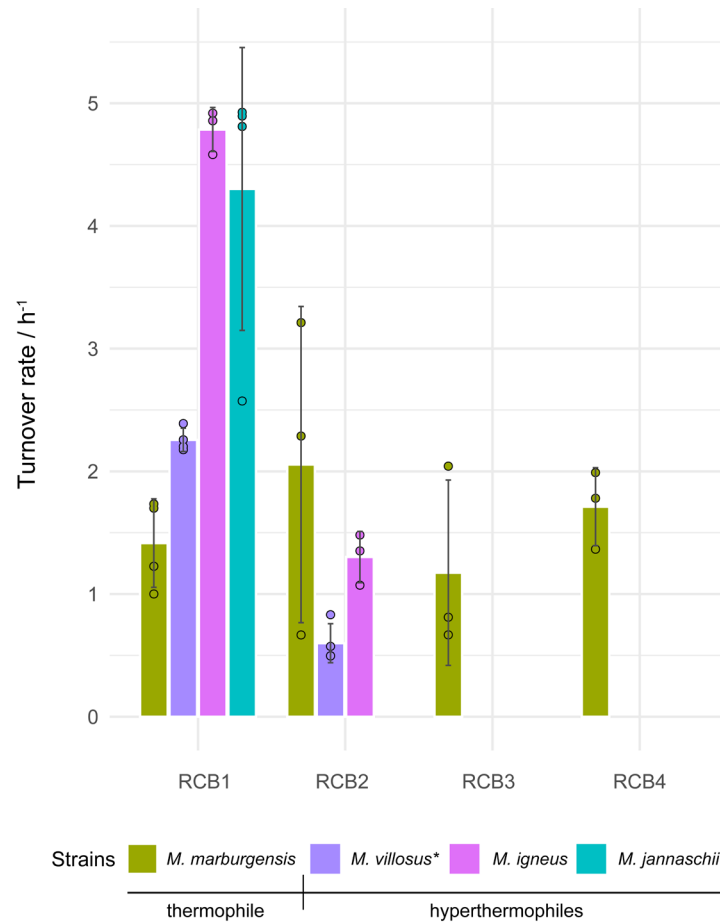

**Fig. S13** Repetitive closed batch cultivations of thermophilic and hyperthermophilic methanogens in the SBRS at 50 bar. The RCB cultivations were performed in quadruplicates with 4 runs RCB1, RCB2, RCB3, and RCB4. Turnover rate / h<sup>-1</sup> is shown. Legend: thermophile- *Methanothermobacter marburgensis* Marburg (65°C, MM medium); hyperthermophiles- *Methanocaldococcus jannaschii* JAL-1 (80°C, 282c 30 medium), *Methanocaldococcus villosus* KIN24-T80 (80°C, 282c18\_E medium\*) and *Methanoterris igneus* Kol 5 (85°C, 282c 30 medium).

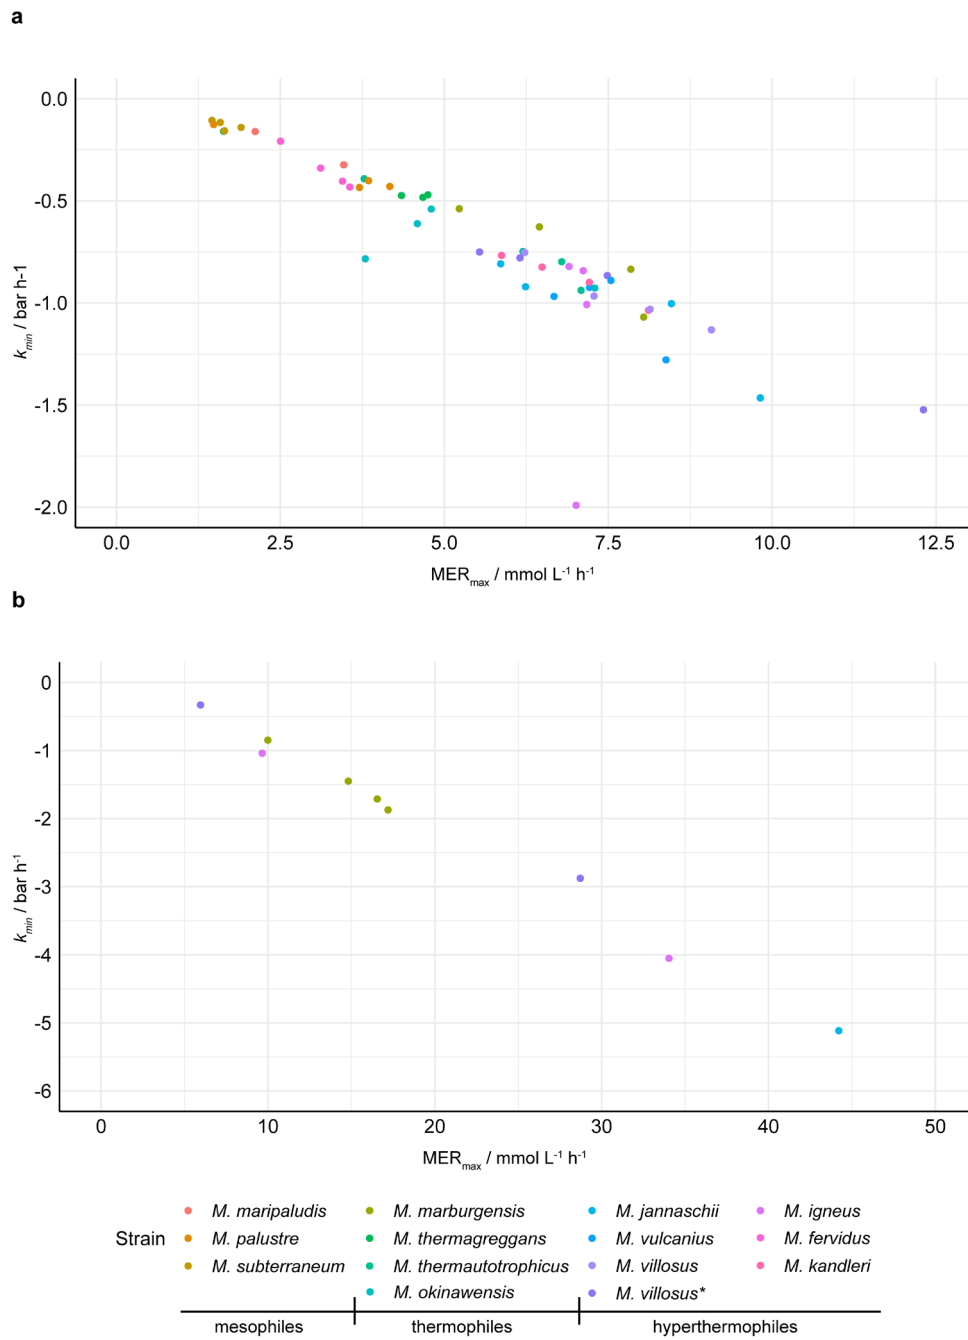

**Fig. S14** Correlation plot of maximum conversion rate  $k_{min} / \text{bar h}^{-1}$  and  $\text{MER}_{max} / \text{mmol L}^{-1} \text{h}^{-1}$  of RCB cultivations in the SBRS at (a) 10 bar and (b) 50 bar.

### **Reactivation of methanogens after dormancy**

It was examined how to store methanogens for fast reactivation from a state of dormancy. In case of failure due to e.g., viral infections, leading to a breakdown of the population or due to contaminations, it is of importance to have back-up cultures for fast reactivation from a state of dormancy. Therefore, studies on the storage of methanogens are inevitable to the successful functioning of an industrial bioprocess. In the microbiological lab, storing microbes in the fridge or freezer is common practice. After the pre-screening we analyzed how fast the vitality (OD and turnover) of mesophilic and (hyper-)thermophilic methanogens can be restored after they were in dormancy at 4°C or -80°C for a defined period. Our results show, that thermophilic (14 weeks at 4°C) and hyperthermophilic (>1 year at -80°C) methanogens possess a 50% higher turnover average (60-88%) after dormancy compared to mesophilic methanogens (Supplementary Materials Table S1).



**Table S1** Dormancy study with mesophilic, thermophilic and hyperthermophilic methanogens

| Methanogens                                        | DSMZ      | Medium  | Growth temp.<br>°C | Dormancy Period |               | Turnover<br>% | OD <sub>average</sub><br>578nm | Lowest pressure<br>bar | Growth after<br>dormancy |
|----------------------------------------------------|-----------|---------|--------------------|-----------------|---------------|---------------|--------------------------------|------------------------|--------------------------|
|                                                    |           |         |                    | weeks (+4°C)    | years (-80°C) |               |                                |                        |                          |
| <i>Methanobacterium lacus 17A1</i>                 | DSM 24406 | MM      | 30                 | 16              |               | 2             | 0.04                           | 1.916                  | no                       |
| <i>Methanobacterium petrolearium</i> Mic5c12T      | DSM 22353 | MM      | 35                 | 25              |               | 15            | -                              | 1.376                  | yes                      |
| <i>Methanobacterium bryantii</i> M.o.H.            | DSM 863   | MM      | 37                 | 25              |               | 1             | -                              | 1.644                  | no                       |
| <i>Methanobacterium palustre</i> F                 | DSM 3108  | 282c 0  | 37                 | 71              |               | 56            | 0.28                           | 0.632                  | yes                      |
|                                                    |           | MM      |                    | 41              |               | 18            | 0.10                           | 1.597                  | yes                      |
|                                                    |           | MM30    |                    | 41              |               | 5             | 0.02                           | 1.910                  | no                       |
| <i>Methanobacterium subterraneum</i> A8p           | DSM 11074 | MM      | 37                 | 25              |               | 81            | 0.28                           | 0.016                  | yes                      |
|                                                    |           | MM30    |                    | 25              |               | 22            | 0.31                           | 1.355                  | yes                      |
| <i>Methanobacterium arcticum</i> M2                | DSM 19844 | MM      | 37                 | 25              |               | 1             | -                              | 1.683                  | no                       |
| <i>Methanosarcina siciliae</i> T4/M                | DSM 3028  | MM      | 37                 | 66              |               | 1             | -                              | 1.964                  | no                       |
|                                                    |           | MM30    | 37                 | 66              |               | 0             | -                              | 1.985                  | no                       |
| <i>Methanothermobacter thermophilus</i> M          | DSM 6529  | MM      | 60                 | 14              |               | 85            | 0.34                           | -0.078                 | yes                      |
| <i>Methanobacterium thermaggregans</i>             | DSM 3266  | MM      | 65                 | 14              |               | 86            | 0.23                           | -0.107                 | yes                      |
| <i>Methanothermobacter marburgensis</i> Marburg    | DSM 2133  | MM      | 65                 | 14              |               | 88            | 0.51                           | -0.159                 | yes                      |
| <i>Methanothermobacter thermautotrophicus</i> RMAS | DSM 23052 | MM      | 65                 | 14              |               | 45            | 0.20                           | 0.745                  | yes                      |
| <i>Methanothermobacter wolfeii</i>                 | DSM 2970  | MM      | 65                 |                 | 7             |               | 0.25                           | -                      | yes                      |
| <i>Methanothermococcus okinawensis</i> IH1         | DSM 14208 | 282c 18 | 65                 |                 | 1             | 60            | 0.85                           | 0.499                  | yes                      |
| <i>Methanocaldococcus jannaschii</i> JAL-1         | DSM 2661  | 282c 30 | 80                 |                 | 1             | 79            | 0.80                           | -0.164                 | yes                      |
| <i>Methanocaldococcus villosus</i> KIN24-T80       | DSM 22612 | 282c 30 | 80                 |                 | 1             | 84            | 0.13                           | -0.239                 | yes                      |
| <i>Methanocaldococcus vulcanius</i> M7             | DSM 12094 | 282c 30 | 80                 |                 | 1             | 84            | 0.50                           | -0.265                 | yes                      |

**Table S2** Cysteine requirements in the media of thermophilic and hyperthermophilic methaogens and the presence of cysteine biosynthesis machinery SepRS/SepCysS and cysteine metabolizing enzymes

| Strains                                       | Class           | SepRS/ SepCysS | CDD  | CDS  | Cysteine addition | References |
|-----------------------------------------------|-----------------|----------------|------|------|-------------------|------------|
| <i>Methanocaldococcus jannaschii</i>          | Methanococci    | +              | +    | -    | +                 | 11,12      |
| <i>Methanocaldococcus vulcanius</i>           | Methanococci    | +              | n.d. | n.d. | +                 | 11         |
| <i>Methanotorrus igneus</i>                   | Methanococci    | n.d.           | +    | -    | +                 | 11,12      |
| <i>Methanopyrus kandleri</i>                  | Methanopyrus    | +              | -    | +    | - (vitamins)      | 11,12      |
| <i>Methanothermus fervidus</i>                | Methanobacteria | n.d.           | -    | +    | +                 | 12         |
| <i>Methanothermobacter marburgensis</i>       | Methanobacteria | n.d.           | -    | +    | -                 | 11,12      |
| <i>Methanothermobacter thermautotrophicus</i> | Methanobacteria | +              | -    | +    | -                 | 11-13      |

n.d. not determined

SepRS/SepCysS- cysteine production via t-RNA dependent pathway<sup>12,14</sup>

Cysteine desulphidase (CDD)- cysteine and water are metabolized to H<sub>2</sub>S, NH<sub>4</sub><sup>+</sup>, H<sup>+</sup> and pyruvate<sup>15</sup>

Cysteine desulphurase (CSD)- cysteine is processed to L-alanine and is bound to the enzyme-S-sulfanylcysteine<sup>16</sup>

**Table S3** Core lipids of prioritized methanogens

| Strains                                                    | Core lipids                |                                                                        |                 |                            | Reference |
|------------------------------------------------------------|----------------------------|------------------------------------------------------------------------|-----------------|----------------------------|-----------|
|                                                            | Archaeol                   | Tetraether lipids                                                      | Hydroxyarchaeol | Macrocylic archaeol        |           |
| <i>Methanococcus maripaludis</i> S2                        | +                          | nd.                                                                    | +               | -                          | 17-19     |
| <i>Methanobacterium palustre</i> F                         | +                          | +                                                                      | -               | -                          | 17-19     |
| <i>Methanobacterium subterraneum</i> A8p                   | +                          | +                                                                      | -               | -                          | 17-19     |
| <i>Methanothermobacter marburgensis</i> Marburg            | +                          | GDGT-0 <sup>a</sup>                                                    | -               | -                          | 17-21     |
| <i>Methanothermobacter thermophilus</i> M                  | +                          | +                                                                      | -               | -                          | 17-19     |
| <i>Methanobacterium thermaggregans</i>                     | +                          | +                                                                      | -               | -                          | 17-19     |
| <i>Methanothermobacter thermautotrophicus</i> DeltaH       | +                          | GDGT<br>75-83 mol%                                                     | -               | -                          | 17-21     |
| <i>Methanothermococcus okinawensis</i> IH1                 | 59% (mostly<br>monocyclic) | 3.7% GDGT-0                                                            | -               | 35% (mostly<br>monocyclic) | 19,22,23  |
|                                                            |                            | 1% GMGT-0                                                              |                 |                            |           |
|                                                            |                            | 0.4% GMGT-0',<br>0.2% GTGT-0                                           |                 |                            |           |
| <i>Methanocaldococcus jannaschii</i> JAL-1 <sup>b, g</sup> | 18 % <sup>c</sup>          | 36%                                                                    | -               | 46%                        | 17-19,24  |
|                                                            | 7 % <sup>d</sup>           | 52%                                                                    |                 | 41%                        |           |
|                                                            | 0-2 % <sup>e</sup>         | 65%                                                                    |                 | 35%                        |           |
|                                                            | 0-2 % <sup>f</sup>         | 64%                                                                    |                 | 36%                        |           |
| <i>Methanocaldococcus vulcanius</i> M7                     | +                          | +                                                                      | -               | +                          | 17-19     |
| <i>Methanocaldococcus villosus</i> KIN24-T80               | 39% (mostly<br>dicyclic)   | 4.3% GDGT-0                                                            | -               | 55% (mostly<br>dicyclic)   | 19,23     |
|                                                            |                            | 0.1% GMGT-0                                                            |                 |                            |           |
|                                                            |                            | 1% GMGT-0',<br>0.2% GTGT-0                                             |                 |                            |           |
| <i>Methanoterris igneus</i> Kol5                           | +                          | GDGT-0                                                                 | -               | +                          | 17,18,25  |
| <i>Methanothermus fervidus</i> H9                          | +                          | GDGT-0<br>GTGT/ H-GDGT                                                 | -               | -                          | 17,21     |
| <i>Methanopyrus kandleri</i> AV19                          | + <sup>h</sup>             | GDGT-0,<br>GDGT-1,<br>GDGT-2,<br>GDGT-3,<br>GDGT-4,<br>GTGT/<br>H-GDGT | +               | -                          | 17-19,21  |

a growth with detergent, increased caldarchaeols<sup>26</sup>, b archaeols decline and caldarchaeols, macrocyclic archaeol polar lipids, increase as temperature and pressure rise<sup>24</sup>  
c 1 atm 1 bar and 75°C; d 1 atm 1 bar and 86°C; e 250 atm 253 bar and 86°C; f 500 atm 506 bar and 86°C; g mostly GDGT-0, h unsaturated archaeol-allyl ether type core lipids- geranylgeranyl group-containing archaeol

## Supplementary references

1. Bryant, M. P., Wolin, E. A., Wolin, M. J. & Wolfe, R. S. *Methanobacillus omelianskii*, a symbiotic association of two species of bacteria. *Archiv für Mikrobiologie* **59**, 20–31 (1967).
2. Balch, W. E., Fox, G. E., Magrum, L. J., Woese, C. R. & Wolfe, R. S. Methanogens: reevaluation of a unique biological group. *Microbiological Reviews* **43**, 260–296 (1979).
3. Ermler, U., Grabarse, W., Shima, S., Goubeaud, M. & Thauer, R. K. Crystal structure of methyl-coenzyme M reductase: the key enzyme of biological methane formation. *Science* **278**, 1457–1462 (1997).
4. Borrel, G., Adam, P. S., McKay, L. J., Chen, L.-X., Sierra-García, I. N., Sieber, C. M., Letourneur, Q., Ghoulane, A., Andersen, G. L. & Li, W.-J. Wide diversity of methane and short-chain alkane metabolisms in uncultured archaea. *Nature microbiology* **4**, 603–613 (2019).
5. Pappenreiter, P. A., Zwirtmayr, S., Mauerhofer, L.-M., Rittmann, S. K.-M. R. & Paulik, C. Development of a simultaneous bioreactor system for characterization of gas production kinetics of methanogenic archaea at high pressure. *Engineering in Life Sciences* **19**, 537–544 (2019).
6. UniProt: a worldwide hub of protein knowledge. *Nucleic Acids Res* **47**, D506–D515 (2019).
7. El-Gebali, S., Mistry, J., Bateman, A., Eddy, S. R., Luciani, A., Potter, S. C., Qureshi, M., Richardson, L. J., Salazar, G. A., Smart, A., Sonnhammer, E. L. L., Hirsh, L., Paladin, L., Piovesan, D., Tosatto, S. C. E. & Finn, R. D. The Pfam protein families database in 2019. *Nucleic Acids Res* **47**, D427–D432 (2019).
8. Bellack, A. Cell architecture and flagella of hyperthermophilic Archaea. (2011).
9. Bellack, A., Huber, H., Rachel, R., Wanner, G. & Wirth, R. *Methanocaldococcus villosus* sp. nov., a heavily flagellated archaeon that adheres to surfaces and forms cell–cell contacts. *International journal of systematic and evolutionary microbiology* **61**, 1239–1245 (2011).
10. König, H., Rachel, R. & Claus, H. in *Archaea* 315–340 (American Society of Microbiology, 2007).
11. Hidese, R., Inoue, T., Imanaka, T. & Fujiwara, S. Cysteine desulphurase plays an important role in environmental adaptation of the hyperthermophilic archaeon *Thermococcus kodakarensis*. *Molecular Microbiology* **93**, 331–345 (2014).
12. Liu, Y., Sieprawska-Lupa, M., Whitman, W. B. & White, R. H. Cysteine Is Not the Sulfur Source for Iron-Sulfur Cluster and Methionine Biosynthesis in the Methanogenic Archaeon *Methanococcus maripaludis*. *Journal of Biological Chemistry* **285**, 31923–31929 (2010).
13. Kärcher, U., Schröder, H., Haslinger, E., Allmaier, G., Schreiner, R., Wieland, F., Haselbeck, A. & König, H. Primary structure of the heterosaccharide of the surface glycoprotein of *Methanothermobacter ferredoxinus*. *Journal of Biological Chemistry* **268**, 26821–26826 (1993).
14. Klipcan, L., Frenkel-Morgenstern, M. & Safro, M. G. Presence of tRNA-dependent pathways correlates with high cysteine content in methanogenic Archaea. *Trends in Genetics* **24**, 59–63 (2008).
15. Tchong, S.-I., Xu, H. & White, R. H. l-Cysteine Desulfidase: An [4Fe-4S] Enzyme Isolated from *Methanocaldococcus jannaschii* That Catalyzes the Breakdown of l-Cysteine into Pyruvate, Ammonia, and Sulfide. *Biochemistry* **44**, 1659–1670 (2005).
16. Zheng, L., White, R. H., Cash, V. L., Jack, R. F. & Dean, D. R. Cysteine desulfurase activity indicates a role for NIFS in metallocluster biosynthesis. *Proc Natl Acad Sci USA* **90**, 2754 (1993).
17. Koga, Y., Nishihara, M., Morii, H. & Akagawa-Matsushita, M. Ether polar lipids of methanogenic bacteria: structures, comparative aspects, and biosyntheses. *Microbiology and Molecular Biology Reviews* **57**, 164–182 (1993).
18. Koga, Y., Morii, H., Akagawa-Matsushita, M. & Ohga, M. Correlation of Polar Lipid Composition with 16S rRNA Phylogeny in Methanogens. Further Analysis of Lipid Component Parts. *Bioscience, Biotechnology, and Biochemistry* **62**, 230–236 (1998).
19. Koga, Y. & Morii, H. Recent Advances in Structural Research on Ether Lipids from Archaea Including Comparative and Physiological Aspects. *Bioscience, Biotechnology, and Biochemistry* **69**, 2019–2034 (2005).
20. Knappy, C. S. Mass spectrometric studies of ether lipids in Archaea and sediments. (2010).
21. Schouten, S., Hopmans, E. C. & Sinninghe Damsté, J. S. The organic geochemistry of glycerol dialkyl glycerol tetraether lipids: A review. *Organic Geochemistry* **54**, 19–61 (2013).
22. Taubner, R.-S., Baumann, L. M., Bauersachs, T., Clifford, E. L., Mähnert, B., Reischl, B., Seifert, R., Peckmann, J., Rittmann, S. K.-M. & Birgel, D. Membrane Lipid Composition and Amino Acid Excretion Patterns of *Methanothermobacter okinawensis* Grown in the Presence of Inhibitors Detected in the Enceladian Plume. *Life* **9**, 85 (2019).
23. Baumann, L. M. F., Taubner, R.-S., Bauersachs, T., Steiner, M., Schleper, C., Peckmann, J., Rittmann, S. K.-M. R. & Birgel, D. Intact polar lipid and core lipid inventory of the hydrothermal vent methanogens *Methanocaldococcus villosus* and *Methanothermobacter okinawensis*. *Organic Geochemistry* **126**, 33–42 (2018).
24. Kaneshiro, S. M. & Clark, D. S. Pressure effects on the composition and thermal behavior of lipids from the deep-sea thermophile *Methanococcus jannaschii*. *J. Bacteriol.* **177**, 3668 (1995).

25. Trincone, A., Nicolaus, B., Palmieri, G., De Rosa, M., Huber, R., Huber, G., Stetter, K. O. & Gambacorta, A. Distribution of complex and core lipids within new hyperthermophilic members of the Archaea domain. *Systematic and applied microbiology* **15**, 11–17 (1992).
26. Gräther, O. W., Arigoni, D. & Jaun, B. Zur Struktur und Biosynthese der Tetraetherlipide der Archaea. (1994). doi:10.3929/ethz-a-001377425
