# Supplementary material for: Hyperthermophilic methanogenic archaea act as high-pressure CH4 cell factories
Source: PubMed Central journal article supplement (PMC7935968; doi:10.1038/s42003-021-01828-5), 2021-03-05
Supplement: 42003_2021_1828_MOESM3_ESM.pdf [file 42003_2021_1828_MOESM3_ESM.pdf]

## **Description of Additional Supplementary Files**

**File Name:** Supplementary Data 1

**Description:** Supplementary data and information to the manuscript entitled *Hyperthermophilic methanogenic archaea act as high-pressure CH<sub>4</sub> cell factories*

**File Name:** Supplementary Data 2

**Description:** Supplementary data about the cell envelope characteristics of prioritized methanogens with respect to S-layer occurrence to the manuscript entitled *Hyperthermophilic methanogenic archaea act as high-pressure CH<sub>4</sub> cell factories*
